# Supplementary material for: The α1,6-Fucosyltransferase Gene (fut8) from the Sf9 Lepidopteran Insect Cell Line: Insights into fut8 Evolution
Source: PubMed Central journal article supplement (PMC4204859; doi:10.1371/journal.pone.0110422), 2014-10-21
Supplement: pone.0110422.s001.pdf [file pone.0110422.s001.pdf]

Figure S1

|                                  |                     |                                                                                                |
|----------------------------------|---------------------|------------------------------------------------------------------------------------------------|
| <b>Nematoda</b>                  | Fut8Cjaponica       | -----MSVFHQFPPNISHFRSPASRSDMIKCI <del>AVVGTVI</del> -----WMTM                                  |
|                                  | Fut8Celegans        | -----MLKCIAAVGT <del>VV</del> -----WMTM                                                        |
|                                  | Fut8Cbrenneri       | -----MFKCIAAVGT <del>VV</del> -----WMTM                                                        |
|                                  | Fut8Cremanei        | -----MFKCIAAVGT <del>VV</del> -----WMTM                                                        |
|                                  | Fut8Asuum           | -----MQQLGCSMRRAAMA <del>AVAV</del> -----WVLI                                                  |
|                                  | Fut8Lloa            | -----MKLR-RTSCSCSMHCILITAV <del>VI</del> -----WSSI                                             |
|                                  | Fut8Bmalayi         | -----MKLR-RTVCPCSMHCILISAV <del>VI</del> -----WSSI                                             |
|                                  | Fut8Wbancrofti      | -----MKLR-RTGCSCSMHCILITAV <del>VI</del> -----WSSI                                             |
|                                  | Fut8Tspiralis       | -----                                                                                          |
| <b>Arthropoda/trombidiformes</b> | Fut8Turticae        | -----MALNFAYAGRVLVGV <del>VLV</del> -----WLLL                                                  |
| <b>Cnidaria</b>                  | Fut8Hmagnipapillata | -----MAAKIM--RYIGFV <del>TVL</del> -----WLCV                                                   |
|                                  | Fut8Nvectensis      | -----MTRRSW--RYLLILL <del>TI</del> -----WLLI                                                   |
| <b>Arthropoda/Mesostigmata</b>   | Fut8Moccidentalis   | -----MARSIPLTDSTWMSNAIH <del>DYAAASDPPGYHIVSGVAL</del>                                         |
| <b>Chordata</b>                  | Fut8Cintestinalis   | -----ML--RRGQVFI <del>FIGILLS</del> -----ALNI                                                  |
| <b>Arthropoda/Maxillopoda</b>    | Fut8Lsalmonis       | -----MR--CKSIH <del>FFVFII</del> LWI-----WLMI                                                  |
| <b>Echinoderma</b>               | Fut8SpurpuratusA    | -----                                                                                          |
| <b>Annelida</b>                  | Fut8Cteleata        | -----MRGTW--RVVAGLL <del>VF</del> -----WLLV                                                    |
| <b>Hemichordata</b>              | Fut8SkowalevskiiA   | -----MKT <del>LW</del> --KFVIAL <del>LF</del> -----W <del>FVI</del>                            |
| <b>Cephalochordata</b>           | Fut8Bfloridae       | -----                                                                                          |
| <b>Chordata</b>                  | Fut8Xtropicalis     | -----MRPWTGSW--RWIML <del>ILFA</del> -----WGTL                                                 |
|                                  | Fut8Rnorvegicus     | -----MRAWTGSW--RWIML <del>ILFA</del> -----WGTL                                                 |
|                                  | Fut8Hsapiens        | -----MRPWTGSW--RWIML <del>ILFA</del> -----WGTL                                                 |
|                                  | Fut8Btaurus         | -----MRPWTGSW--RWIML <del>ILFA</del> -----WGTL                                                 |
|                                  | Fut8Acarolinensis   | -----MRPWTGSW--RWIML <del>ILFA</del> -----WGTL                                                 |
|                                  | Fut8Ggallus         | -----MRPWTGSW--RWIML <del>ILFA</del> -----WGTL                                                 |
|                                  | Fut8Mgallopavo      | -----MRPWTGSW--RWIML <del>ILFA</del> -----WGTL                                                 |
|                                  | Fut8Tguttata        | -----MRPWTGSW--RWIML <del>ILFA</del> -----WGTL                                                 |
|                                  | Fut8DrerioB         | -----MRPWTGSW--RWIAL <del>VLLA</del> -----WGTL                                                 |
|                                  | Fut8Trubipres       | -----MRPWAGSW--RWITL <del>VLLA</del> -----WGTL                                                 |
|                                  | Fut8Oniloticus      | -----MRPWAGSW--RWITL <del>VLLA</del> -----WGTL                                                 |
|                                  | Fut8Olatipes        | -----MRPWAGSW--RWITL <del>VLLA</del> -----WGTL                                                 |
| <b>Arthropodes/Lepidoptera</b>   | Fut8Hmelpomene      | -----MYLSKWK-RVT <del>VVLLLV</del> -----W <del>IIV</del>                                       |
|                                  | Fut8Dplexippus      | -----MYLTKWK-RAAV <del>LLFI</del> -----W <del>IAV</del>                                        |
|                                  | Fut8Emori           | -----MYFAKWK-RVAV <del>VLLAV</del> -----W <del>IIVV</del>                                      |
|                                  | Fut8Sfrugiperda     | -----MYLAKWK-RAAV <del>VLLFV</del> -----W <del>IIVV</del>                                      |
|                                  | Fut8Msexta          | -----MYLAKWK-RVAV <del>VLLVI</del> -----W <del>IIVV</del>                                      |
| <b>Arthropodes/Hymenoptera</b>   | Fut8Mrotundata      | -----MATFWSGRPGWLK <del>VGIVLLAT</del> -----W <del>LLV</del>                                   |
|                                  | Fut8Amellifera      | -----MATFWSGRPGWLK <del>VGLALLAT</del> -----W <del>LLI</del>                                   |
|                                  | Fut8Bimpatiens      | -----MATFWSGRPGWLK <del>VGIALLAT</del> -----W <del>LLV</del>                                   |
|                                  | Fut8Hsaltator       | -----MAAICSGRLGWLK <del>IVIALLAT</del> -----W <del>LIA</del>                                   |
|                                  | FUT8Cfloridanus     | -----MLAICSGRPGWLK <del>LGIALLIT</del> -----W <del>FFV</del>                                   |
|                                  | Fut8Sinvicta        | -----MAAICSGRPGWLK <del>LGIALLAT</del> -----W <del>FLV</del>                                   |
|                                  | Fut8Acephalotes     | -----MAAICSGRPGWLK <del>LGIALLAA</del> -----W <del>FLV</del>                                   |
|                                  | FUT8Aechinator      | -----MAAICSGRPGWLK <del>LGIALLAA</del> -----W <del>FLV</del>                                   |
| <b>Arthropodes/Phtiraptera</b>   | Fut8Phumanus        | 0 MEHKKVYSKINLNLIN <del>VIFS</del> YEVLCNKAMRSQICS-RILL <del>VSFIV</del> -----W <del>FII</del> |
| <b>Arthropodes/Chilopoda</b>     | Fut8Smaritima       | -----MAVGVG-KAIV <del>VLLAV</del> -----W <del>LI</del>                                         |
| <b>Arthropodes/Brachiopoda</b>   | Fut8Dpulex          | -----MTMNLRSSNKILA-QAAI <del>ILFFF</del> -----W <del>VVA</del>                                 |
| <b>Arthropodes/Hemiptera</b>     | Fut8Apisum          | -----MRQGGWL-RILAF <del>LAFS</del> -----W <del>VAF</del>                                       |
| <b>Arthropodes/Coleoptera</b>    | Fut8Tcastaneum      | -----MDTILRRIN <del>VVGWH</del> -RMLV <del>VFLFI</del> -----W <del>LVI</del>                   |
| <b>Arthropodes/Diptera</b>       | Fut8Dmojavensis     | -----ML-----LVRQLFGSSNSWV-RALI <del>IFVLA</del> -----W <del>AVL</del>                          |
|                                  | Fut8Dpseudo         | -----ML-----LVRQLFGASANSWV-RALVI <del>IFVLA</del> -----W <del>VAL</del>                        |
|                                  | Fut8Dananassae      | -----ML-----LVRQLFGASANSWA-RALI <del>IFVLA</del> -----W <del>VAL</del>                         |
|                                  | Fut8Dmelanogaster   | -----ML-----LVRQLFGASANSWA-RALI <del>IFVLA</del> -----W <del>IGL</del>                         |
|                                  | Fut8Agambiae        | -----M-----IVRQLMG--LNPWA-RVL <del>VPLFV</del> -----W <del>VLF</del>                           |
|                                  | Fut8Aaegypti        | -----M-----ILRQLMG--LNTWV-RVL <del>IGFISV</del> -----W <del>VIL</del>                          |
|                                  | Fut8Cpipiens        | -----M-----ILRQLMG--LNTWV-RVL <del>IAFISV</del> -----W <del>VIL</del>                          |

|                        |   |                                                               |
|------------------------|---|---------------------------------------------------------------|
| Fut8Cjaponica          | 1 | <u>FLFLYLQLSNNN</u> -----TS-----GGDTI-----RAWRQTKEAIERLQ      |
| Fut8Celegans           | 1 | <u>FLFLYSQLSNNQ</u> -----S-----GGDSI-----RAWRQTKEAIDKLQ       |
| Fut8Cbrenneri          | 1 | <u>FLFLYLQLSNNQ</u> -----TS-----GGDSI-----RAWRQTKEAIDKLQ      |
| Fut8Cremanei           | 1 | <u>FLFLYLQLSNNQ</u> -----SS-----GGDSI-----RAWRQTKEAIDKLQ      |
| Fut8Asuum              | 1 | <u>LIYLSIGIFTIQ</u> -----SR-----EAAERQNEDLFVKYGKAMKEVGLR      |
| Fut8Lloa               | 1 | <u>FFYLSLSLYGLQ</u> -----SK-----GKDVNEQQALILNYERALDLAELK      |
| Fut8Bmalayi            | 1 | <u>FFYLSFNLYGLQ</u> -----SK-----GKDI NEERILALNYERALDLAELK     |
| Fut8Wbancrofti         | 1 | <u>FFYLSFNLYGLQ</u> -----SK-----GKDVNEQHALALNYERALDLAELK      |
| Fut8Tspiralis          |   | -----MFCSAEVEFFS--AADPYYNSDVDQHLLKRLLEEAI AEVNTLR             |
| Fut8Turticae           |   | <u>IFFIGGPLLKRTEG</u> -----DYSLINSENGELILARLSRASSELDLSLR      |
| Fut8Hmagnipapillata    |   | <u>LLYMGFNVYQLV</u> -----EESRKSTHELSMVVEKVAHLK                |
| Fut8Nvectensis         |   | <u>LAYMGWNLLVLV</u> -----EDSNKNQAALDRKDRHVDDLN                |
| Fut8Moccidentalis      | 0 | SCYPNERLVP AARNFGGSDHCELOHRVMSMRSRNRGKLYPDRFGIDSRVNRALDELEDLK |
| Fut8CintestinalisA     | 2 | <u>FITWKSCVTSSE</u> -----FSNAQSQQTHVDVILEQLQ                  |
| Fut8Lsalmonis          |   | <u>KFMWSSKTSQSL</u> -----DNSPEFSEDLLKQLEEAQKQIERLT            |
| Fut8SpurpuratusA       |   | -----MVVED-----AHDNNQRNVENGIFDIENMG                           |
| Fut8Cteleata           |   | <u>LLYMSATLFOGG</u> -----S-----DSTADRTERQLSRALHELDLLK         |
| Fut8SkowalevskiiA      |   | <u>LLYLGGGAI GPN</u> -----TEIKLSSRD LNKMISEIELMK              |
| Fut8Bfloridae          |   | --MLGNFY--TG-----DPSTKSSHDLARALAELEKMK                        |
| Fut8Xtropicalis        |   | <u>LFYIGGHLVRDN</u> -----ENPDHSSRELSKILAKLERLK                |
| Fut8Rnorvegicus        |   | <u>LFYIGGHLVRDN</u> -----DHPDHSSRELSKILAKLERLK                |
| Fut8Hsapiens           |   | <u>LFYIGGHLVRDN</u> -----DHPDHSSRELSKILAKLERLK                |
| Fut8Btaurus            |   | <u>LFYIGGHLVRGN</u> -----DHPDHSSRELSKILAKLERLK                |
| Fut8Acarolinensis      |   | <u>LFYIGGHLVRDN</u> -----EHPDHSSRELSKILAKLERLK                |
| Fut8Ggallus            |   | <u>LFYIGGHLVRDS</u> -----EHPDHSSRELSKILAKLERLK                |
| Fut8Mgallopavo         |   | <u>LFYIGGHLVRDS</u> -----EHPDHSSRELSKILAKLERLK                |
| Fut8Tguttata           |   | <u>LFYIGGHLVRDS</u> -----EHPDHSSRELSKILAKLERLK                |
| Fut8DrerioB            |   | <u>LFYIGGHLVKDS</u> -----EHAPRSSRELAKILTKLERLK                |
| Fut8Trubipres          |   | <u>LFYIGGHLVRDS</u> -----EHPERSSRELSKILAKLERLK                |
| Fut8Oniloticus         |   | <u>LFYIGGHLVRDS</u> -----EHPERSSRELSKILAKLERLK                |
| Fut8Olatipes           |   | <u>LFYIGGHLVRDS</u> -----EHPERSSRELSKILAKLERLK                |
| Fut8Hmelpomene         |   | <u>TYLVISPLRCEG</u> -----G-----TEEAADFQERLKT VSSQLES LK       |
| Fut8Dplexippus         |   | <u>TYLVI SPLRCDS</u> -----S-----SEESIDFQERLKTASLQLELLK        |
| Fut8Bmori              |   | <u>TYLVISPLRCSG</u> -----N-----SDEIPDVQERLKRMSSELEVLW         |
| <u>Fut8Sfrugiperda</u> |   | <u>TYLVISPLRCNG</u> -----N-----QDEVAEFQERLKKVSSQLETLR         |
| Fut8Msexta             |   | <u>TYLVISPLRCNG</u> -----S-----ADEAPEFQERLKR VSSQLETLR        |
| Fut8Mrotundata         |   | <u>LIVSVSHIFKAN</u> -----SLSSNN--ESPTNKENAQR LAQMVNDFEILK     |
| Fut8Amellifera         |   | <u>LIISVSHIFKTN</u> -----NLSSNN--ESPTNKENAQR LAQMVNDFEILK     |
| Fut8Bimpatiens         |   | <u>LIISVSHIFKAN</u> -----NLSSNN--ESPTNKENAQR LAQMVNDFEILK     |
| Fut8Hsaltator          |   | <u>LIISISHIFKSN</u> -----ISSNQD--ANAVNKVNMQR LAKMVNDFEILK     |
| FUT8Cfloridanus        |   | <u>LILSIVHIFKLN</u> -----SLSSRD--ASTANKENTQR LAQMVNDFEILK     |
| Fut8Sinivicta          |   | <u>LIITIVHIFKSN</u> -----SLSSRD--ADTANKENTQR LAQMVNDFEILK     |
| Fut8Acephalotes        |   | <u>LIISMIHIFKSN</u> -----SLSSRD--ADTANKENTQR LQMVNDFEILK      |
| FUT8AechinatioR        |   | <u>LIISMIHIFKSN</u> -----SLSSRD--ADTANKENTQR LAQMVNDFEILK     |
| Fut8Phumanus           |   | <u>LLFAARHLSSLK</u> -----SGYGIGQ--NAISEGNKNRLEAALNKLHV LQ     |
| Fut8Smaritima          |   | <u>ILLMTGPILHSN</u> -----ENDEHITRRLTKAMNELEVLK                |
| Fut8Dpulex             |   | <u>LILLTRPPLNNP</u> -----Q-----SDVSSDVLQRLSKAVSELES LK        |
| Fut8Apisum             |   | <u>LLVTVKLV RQQD</u> -----TNDGDSQQLARALRELDKLH                |
| Fut8Tcastaneum         |   | <u>LVFTALPMLGPH</u> -----I-----PSGETKTLERLKRALTDL EALR        |
| Fut8Dmojavensis        |   | <u>VYVFVVKLTNSQ</u> -----AQNOSHQTISASDNEHNARRINQALQ LLEHTE    |
| Fut8Dpseudoobscura     |   | <u>VYVFVVKLTSTQ</u> -----GQA-----TGENEISARRISQALQ LLEHTK      |
| Fut8Dananassae         |   | <u>VYVFVVKLTNTQ</u> -----GQA-----AGESELNARRINQALQ MLEHTR      |
| Fut8Dmelanogaster      |   | <u>VYVFVVKLTNTQ</u> -----GQA-----AGESELNARRISQALQ MLEHTR      |
| Fut8Agambiae           |   | <u>VLIFYSKLNTSA</u> -----ASSS-----SSDGGDDSLKRLERAVQQLERSK     |
| Fut8Aegypti            |   | <u>VLIFYSKLNTGS</u> -----S-----SDSDDAIRRLNQALTYLEKSK          |
| Fut8Cpipiens           |   | <u>VLIFYSKLNTGG</u> -----A-----NDAEDAFRRLNQALSYLEKSK          |

i71

Fut8Cjaponica 2 EQNEDLKSLLDKERT--ERNDQHRKIL-----EQESHQE-P-----VV  
 Fut8Celegans 2 EQNEDLKSILEKERQ--ERNDQHKIM-----EQSHQL---P-----PN  
 Fut8Chrenneri 2 EQNENLKDILENERR--ERNEQHRKIM-----EQTHQV---P-----VN  
 Fut8Cremanei 2 EQNEKLKSIMENERR--ERNDQHRKIL-----EQSHQV---P-----AN  
 Fut8Asuum EQNEELMRLLLEEREV--VAAKEAQLQQ-----NQ---L-----L-----FA  
 Fut8Lloa HENEKHLKLLKGEKI--QPQIKK-LTV-----KKQN-DNILPIKIS-----DEFE  
 Fut8Bmalayi HENEMLRRELLKDEKI--EIVKRKKLIM-----KKQNSNATRIKIN-----NKFG  
 Fut8Wbancrofti HENEMLRRELLKDEKI--QL-KRKKLIM-----KKQNSNATAHAKIS-----NKFE  
 Fut8Tspiralis 2 QQSDSIQQAQFDV--LQKQC-----PQLVDNR-----NFFP  
 Fut8Turticae AQNEELRNLLQN--YIPLGLQL-----NKASDLLKDG-----  
 Fut8Hmagnipapillata RENEKLRSENIPTLKKFKNKIANSKLSQNEENKTLNLANAYIQVK-----  
 Fut8Nvectensis TQNORLQKM--VSELSQKESLE-----SILSKEKKIQ-----  
 Fut8Moccidentalis RQNETELRLVIQA--LNGGK-----  
 Fut8CintestinalisA 2 LQQNEYKAVLHL--A-----DDVISRLKREAAATTT-----TSHTRLS  
 Fut8Lsalmonis DDNIRLNTNIVKD--YQIKEGGDSFH-----PVKDKLKESH-----  
 Fut8SpurpuratusA 2 DSTQED-----L--VASSSNG--ANDGGVDYMRNKLKDAEEIISRMEKESKGIQ  
 Fut8Cteleata HQNQELHELAEQ--LKQIQNNPVLGATADPTKETQALKVQLAEARKQV-----H  
 Fut8SkowalevskiiA 2 DQNEKLKQANE--LREIALLRGDSEM--SKDETVKFMQQLESAQNQI-----A  
 Fut8Bfloridae 0 QQNEELRRMADE--LRYGVQMS---Q--DVDRVSLLEQLAKCESDA-----N  
 Fut8Xtropicalis 2 QQNEDLRRMAES--LRIPEGPIEQGA--AAGRIRALEEQLLKAKEQI-----E  
 Fut8Rnorvegicus 2 QQNEDLRRMAES--LRIPEGPIDQGT--ATGRVVRVLEEQLVKAKEQI-----E  
 Fut8Hsapiens 2 QQNEDLRRMAES--LRIPEGPIDQGP--AIGRVRVLEEQLVKAKEQI-----E  
 Fut8Btaurus 2 QQNEDLRRMAES--LRIPEGPIDQGP--ASGRIRALEEQLVKAKEQI-----E  
 Fut8Acarolinensis 2 QQNEDLRRMAES--LRIPEGPVDQGP--AVGRVHALEEQLIKAKEQM-----E  
 Fut8Ggallus 2 QQNEDLRRMAES--LRIPDGPIDQGP--AAGKVHALEEQLLKAKEQI-----E  
 Fut8Mgallopavo 2 QQNEDLRRMAES--LRIPDGPIDQGP--AAGKVHALEEQLLKAKEQI-----E  
 Fut8Tguttata 2 QQNEDLRRMAES--LRIPDGPIDQGP--AAGKVHALEEQLLKAKEQI-----E  
 Fut8DrerioB 2 QQNEDLRRMAQS--LRIPEGQSD--GPI--SSGRLRSLEEQLSRAKQKI-----Q  
 Fut8Trubipres 2 QQNEDLRRMAES--LRIPEGQADAGSL--AAGRLRSLEDQLSRAKQKI-----H  
 Fut8Oniloticus 2 QQNEDLRRMAES--LRIPEGQADAGSL--AAGRLRSLEDQLTRAKQKI-----H  
 Fut8Olatipes 2 QQNEDLRRMAES--LRIPEGQAEAGSL--AAGRLRSLEDQLTRAKQKI-----H  
 Fut8H melpomene 2 QQHSNLISQIRK--SSGVN-----LN--GIDT-----  
 Fut8Dplexippus 2 QQHSNLISQIKK--SSGLN-----VN-LNEIDA-----  
 Fut8Bmori 2 QRNSKLIAQIKK--SSGPN-----GN-LKDLDP-----  
 Fut8Sfrugiperda 2 QQHSNLISQIKK--SSSLN-----GN-LKDIDT-----  
 Fut8Msexta HQHNNLIAQIRR--SSGLN-----GN-FKDIDT-----  
 Fut8Mrotundata 2 RQNEALKNIILG-----ERSKSI--QGDHLGSIHEKLDKVS-----  
 Fut8Amellifera 2 RQNEALKNIVLG-----ERSKSI--QGDHLGSIQEKLEKVS-----  
 Fut8Bimpatiens 2 RQNEALKNIILG-----ERSKSI--QGDHLGSIQEKLEKVS-----  
 Fut8Hsaltator 2 RQNDALKNFILG-----EGSKVM--QGDHLGSIQDRLEKAS-----  
 FUT8Cfloridanus 2 QNDALKNFILG-----EGPKSI--QGDHLGSIQDKVGKVS-----  
 Fut8Sinivicta 2 QNDALKNFILG-----EGAKSI--QGDHLGSIQDKLEKAS-----  
 Fut8Acephalotes 0 QNDALKNFILG--YANISREGSKSI--QGDHLGSVQDRLEKAS-----  
 FUT8Aechinatior QNDALKNFILG-----EGSKSI--QGDHLGSVQDRLEKAS-----  
 Fut8Phumanus 2 QHSEHLKAVFET--LNNAEENDSVN-----EILKSAEK-V-----  
 Fut8Smaritima 2 RQNDLRAILLE--FKIVDVVDSKD-----QLLDDLHEKLNKAN-----ELLH  
 Fut8Dpulex VRNQELQWILTN--FSHEAQSGKIK-----EGVVERLRSTLED-K-----  
 Fut8Apisum 2 KSNAEALNALVLD--LNYNPRIDNKK-----ILLSY-----FQ  
 Fut8Tcastaneum 2 KQNNELQEIFKD--INVDSLGRDQKEA--IENFQYRLTK-----AEHTFS  
 Fut8Dmojavensis 2 RRNEELKLLIDE--LMSQDLKQSA-----MKLVQRLNDSHNKQSMG-----DDTLFE  
 Fut8Dpseudoobscura 2 QRNEELKQLIDE--LMSQDLKQSA-----LKLQVQKLENDPLNPKQGLESLGAPEAFFD  
 Fut8Dananassae 2 QRNEELKQLIDE--LMSQDLKQSA-----LKLQVQRLNDAQNTKNSADGIGPEPESLFE  
 Fut8Dmelanogaster 2 QRNEELKQLIDE--LMSQDLKQSA-----MKLVQRLNDAQNTKNSADGIGPEPESLFE  
 Fut8Agambiae QVDQELRLLVDE--YLADAGTSADR--KQHFIDELGS-----K-----LE  
 Fut8Aegypti QVDQELRLLVDE--YLSQ--SYNR--KQKFVDELGN-----K-----LQ  
 Fut8Cpipiens QVDQELRLLVDE--YISDT--SYNR--KQKFVDELGN-----K-----LQ

i21

Fut8Cjaponica F-----GPO---TT--ARPI--KVIQSDVLGSVEQEVHKRMLDDRI  
 Fut8Celegans P-----ENP---SLPKPEPVKEIISKPSILGPVQQEVQKRMLDDRI  
 Fut8Cbrenneri S-----DSQ---SLPKPEPIKQIILKSSKLGSVQEVQKRMLDDRI  
 Fut8Cremanei P-----ESQ---SIPKPEPVKLVAKPNKLGTEQEVQKRMLDDRI  
 Fut8Asuum 0 P-----KAQ---SAV--PSSIAEKSTPRDLFTKEHEIARRDLDNSI  
 Fut8Lloa 0 K-----RKQ---QWIDREKSETLLLLPSNGFSMKHE-----  
 Fut8Bmalayi 0 K-----G-T--KRIERGKSEILNLLQSNQSGFSMKHEIARRELHNSI  
 Fut8Wbancrofti 0 K-----G-T--KRINRGKSETLSLLPSNGFSMKHEIARRELHNSI  
 Fut8Tspiralis R-----PRVTAPEQNNHGQTQQORRISPSHELIIYQRLHLEL  
 Fut8Turticae ---GLPGEANLPIPASPVSAALAPLSSSPSSSSSSISLNLFASVFNKYEQARRRVSYSY  
 Fut8Hmagnipapillata -----EL----KKQLQLKESVPLHSLNIEVLSRRIFNQI  
 Fut8Nvectensis 0 -----TL----KR--FSD--KKPQVTEHEKYRRAENEV  
 Fut8Moccidentalis -----PI-----PQOELRIAPPTDYEVRRAAENDV  
 Fut8CintestinalisA 1 T-----STETIPT-----TTEIQRPAHNLADQDPYIRKLLNDA  
 Fut8Lsalmonis -----DSSSSSETLDGPSTAYENTRRRIKHVD  
 Fut8SpurpuratusA 1 D-----TROQGSDDSDSNQQYCGSEPSNAYEKIRKVDNGV  
 Fut8Cteleata N-----LOK-----RSNAFPLSLAQEELRRKVVETGV  
 Fut8SkowalevskiiA 1 D-----LSQAVGKNTKSDVSLHSGSPDHEKLRRIIDNGV  
 Fut8Bfloridae 1 S-----NKQQ-----APVGSLDSPSKHEQLQRKLEDGV  
 Fut8Xtropicalis 1 M-----YKQ-----QSSNAVSGLGKDEILRRAIENGA  
 Fut8Rnorvegicus 1 N-----YKK-----QA---RNLGKDHEILRRRIENGA  
 Fut8Hsapiens 1 N-----YKK-----QT--RNLGKDHEILRRRIENGA  
 Fut8Btaurus 1 N-----YKK-----QT--RNLGKDHEILRRRIENGA  
 Fut8Acarolinensis 1 N-----YKQ-----QTG--DVLGKHEILRRRIENGA  
 Fut8Ggallus 1 N-----YKK-----QTG--D-GLGKDHEILRRRIENGA  
 Fut8Mgallopavo 1 N-----YKK-----QTV--D-GLGKDHEILRRRIENGA  
 Fut8Tguttata 1 N-----YKK-----RTG--D-GLGKDHEILRRRIENGA  
 Fut8DrerioB 1 S-----FQR-----LSG--EGPGREQEELRRKVENG  
 Fut8Trubipres 1 S-----FQK-----LTG--DGGPPTQEELRRRVENG  
 Fut8Oniloticus 1 S-----FQK-----LTG--DGGPPTQEELRRRVENG  
 Fut8Olatipes 1 S-----FQK-----LTG--DGGPPTQEELRRKAENG  
 Fut8Hmelpomene -----SAF--HTVGGPSEEEYSLRRRVYSNT  
 Fut8Dplexippus -----AEF--HNGGGPSEEEYENLRRRIYSNT  
 Fut8Bmori -----AFWNLEAGLGPSEEEYENLRRRIHSNT  
 Fut8Sfrugiperda -----GSLFLDGVQGPTEYENLRRRIYSNT  
 Fut8Msexta -----GALFLNAGQGPTEYENLRRRIHSNT  
 Fut8Mrotundata -----LYDELDTKNNIKHSVPSLEYEDLRRRVRRNV  
 Fut8Amellifera -----IYEDLLDHQDNVKGHIPSSEYEELRRRIRNNV  
 Fut8Bimpatiens -----LYDDLHDHQNDKHGVPSSEYEELRRMIRNNI  
 Fut8Hsaltator -----AAYDLAEQPDRLKHGVPPLYEELRRRLRNDI  
 FUT8Cfloridanus -----AAYDLIEHQDGAQHGVPSLEHEELRRRLKNDI  
 Fut8Sinivicta -----VYYDLIDHQDGSKHGVPSSSEYEELRRRLRNDI  
 Fut8Acephalotes -----VYYDLIDHQDGSKHGIPSLEYEELRRRLRNDI  
 FUT8AechinatioR -----VYYDLIDHQDGSKHGVPSSLEYEELRRRLRNDI  
 Fut8Phumanus -----VTPF-----EEKIDVKSLYNSPSLGYETLRKRIQDDA  
 Fut8Smaritima 1 -----KAESGSTNTVCDPSAQFENVRRRIINQV  
 Fut8Dpulex -----IRLP-----INFNGLEKKSSGSPSKEYEVRRAIYRGV  
 Fut8Apisum -----NSKQSLNGPSEEEYELSRRIYSNT  
 Fut8Tcastaneum K-----NQ--VGYVSAKEEPNSEYELRRRIYSNT  
 Fut8Dmojavensis VIPADAAGDQOHHQQQP-----QPQPQQLGADAGQLPGQPGIEPSLEYELTRRIQNTI  
 Fut8Dpseudoobscura SAPADLRGWNNAEGGNDPLDGAQAQPDLLS-----GDDLGHGEPSEMEYFTRRRRIQNTI  
 Fut8Dananassae SAPADLRSWNNVVEAAPN-D-----IV-D-----VGEHGEIEPSLEYEFTRRRIQNTI  
 Fut8Dmelanogaster SAPADLRGWNNAEGAPN-D-----LEAG-----VPDHGEFEPSEMEYFTRRRRIQNTI  
 Fut8Agambiae QDATGSAGWF-----AVGRPRNGPSLEYERLRRRVETNT  
 Fut8Aegypti IQGAGA-----GRFKGVPSLEYEQLRRRRVYSNA  
 Fut8Cpipiens IQGVGA-----GHFKGVPSLEYEQLRRRRVYSNT

:

Fut8Cjaponica 0 REMFYLLHSQNIENSTK-----ILLENQMTSLMALSGKLEKLDGSE  
 Fut8Celegans REMFYLLHSQTIENSTK-----ILLETQMI SLMGLSAQLEKLEGSE  
 Fut8Chrenneri REMFYLLHSQTIENSTK-----TLLENQMI SLMGLSAKLEKLEGSE  
 Fut8Cremanei REMFYLVHSQSIENSTK-----ALIENQMI SLMGLSAKLEKLEGSE  
 Fut8Asuum 0 RELFFYLNSQFEK--NDGL-----PFARHAMNQVLSLLGQSAAFSDIDGAE  
 Fut8Lloa 0 -----LSSLGQAAAFKNIDLAE  
 Fut8Bmalayi WELYYYLDSQLISTHNNNS-----KFINHIRNQLSLLGQAAAFKNIDSAE  
 Fut8Wbancrofti 0 WELYYYLNSQLISTHNNNS-----KFINHIRNQLSLLGQAAAFKNIDSAE  
 Fut8Tspiralis 0 TELGFAIRGVFEGLLKKEEKQD-----DAHQAIAKAYQRLKRQHOKLITQSLKLG EADDRL  
 Fut8Turticae 1 NELWFFLNDHFHKN-----VSLKLFVNEHRASFMYDLESLSDR--DY  
 Fut8Hmagnipapillata REMWFLISSQVKRMKNIVPKP-----GYEDVLNFLDTYRELNQITERDFEELVSMDSVS  
 Fut8Nvectensis REIFYYLSAEITKINKKIQQA-----K-KQLTHMLKMSETLHQMLTNDLEKMNSLDGKS  
 Fut8Moccidentalis RELWFFARAQLDKLLKEARGA---D---RDVFKRLRQGIYERQLSALVNLDKMTRRDGYE  
 Fut8Cintestinalis 2 HELQLTFRARFGSPSNES-----DPNYYVQWMIDQONALINNIIEFRDQ--NL  
 Fut8Lsalmonis REMWNFINVKLKFPEHRLKS---QNEELSSKLETREVFVFFYNAVLIDMDTLAEVDGHA  
 Fut8SpurpuratusA 2 TEIWYYMRSQNLQKSS---GDQKTQVKIDQILENGGEQORIKPKL-TKKALSGDFG  
 Fut8Cteleata 2 NEMWYLVRSQGLGQLRKEVMQ--NQAAQASLRVQGLMEDAADHRVLLTDLNSLRANGMD  
 Fut8SkowalevskiiA 2 TEIWYYIKSKLNKIKKTS----DKDQIDEQIDEILVDGGDQORSILTDIYLLGVSGGID  
 Fut8Bfloridae 2 RELWFLVKAQLKLMKSDS-----QASSVKDRIDNLLTDVGDHQRITLADAQQLRDADGGL  
 Fut8Xtropicalis 2 KEFWYFVQSEVKKLKHLD-----RNELQRHVDEI I IDMGHQORSVMTDLYYLSQTDGAG  
 Fut8Rnorvegicus 2 KELWFFLQSELKLLKHLE-----GNELQRHADEILLDLGHHERSIMTDLYYLSQTDGAG  
 Fut8Hsapiens 2 KELWFFLQSELKLLKNLE-----GNELQRHADEFLLDLGHHERSIMTDLYYLSQTDGAG  
 Fut8Btaurus 2 KELWFFLQSELKLLKNLE-----GNELQRHADEFLLDLGHHERSIMTDLYYLSQTDGAG  
 Fut8Acarolinensis 2 KELWFFLQSELKLLKSL-----GSELQRHTDELLS DLGDHERSIMTDLYYLSQTDGAG  
 Fut8Ggallus 2 KELWFFLQSELKLLKNLE-----GSELQRRIDEFLS DLGHQERSIMTDLYYLSQTDGAG  
 Fut8Mgallopavo 2 KELWFFLQSELKLLKNLE-----GSELQRRIDEFLS DLGHQERSIMTDLYYLSQTDGAG  
 Fut8Tguttata 2 KELWFFLQSELKLLKNLE-----GSELQTRIDEFLS DLGHQERSIMTDLYYLSQTDGAG  
 Fut8DrerioB 2 RELWYFIHSEIQKLSHVN-----PTDRQKQTDALLQDLGHQORAIMTDLHELQADGAG  
 Fut8Trubipres 2 KEFWYFVRSEVKKLVKVD-----PNERQKYAETLLEDLGHQERSIMTDLYYLSQADGVG  
 Fut8Oniloticus 2 KEFWYFVRSEVKKLANVE-----PSERQKYADTLLQDLGHQERSIMTDLYYLSQADGVG  
 Fut8Olatipes 2 KEFWYFVRNEVKKLANTE-----LSERQKYADTLLQDLGHQERSIMTDLYYLSQADGVG  
 Fut8Hmelpomene 2 KELWYFVNHELKSLVNDVQ-----TDKIKSILDQVADRKRSLSDQEKLPELDGYH  
 Fut8Dplexippus 2 KEIWFYINHELTKLVNDVQ-----PEKVQAILDQVADRKRSLSDQEKLPELDGYE  
 Fut8Bmori 2 KEFWYIANHELKGLMHESDK-----EAKIRAILLEQLSDRKSTLLSDQEKLSEMDGYH  
 Fut8Sfrugiperda 2 KELWYVHHELTKVIQEDNK-----AEKIQTILDQIGERKRSLSDQOQSLPELDGYH  
 Fut8Msexta KELWYVSHELGKLHEENK-----EKKIQAILDQVADRKRSLISDEEKLPELDGYH  
 Fut8Mrotundata 2 QELWYYSIAELSKLKKTKIDKPSYDQKE--KRIQDVLNRVWDHKKRSLIIDIDRLKADGYD  
 Fut8Amellifera 2 QEMWYYINAELSKFRKIDKLNVDQRE--KRIQDTLKNVWDHKKSLTIDIDRLTKADGYD  
 Fut8Bimpatiens 2 QETWYYINAELSKFRKIDKLNVEQRE--KKIQDTLKNVWDHKKSLIIDIDKLMKADGYD  
 Fut8Hsaltator 2 QELWYVIAAELNFKFKHIDDFTHDQKEKEKDIQDVLKNTWEHKKSLIMNVDKLTADGYN  
 Fut8Cfloridanus 2 QETWYYSIAELNFKFKHIDEFTYDQRE--REIQDVLKNVWEHKKSLTNDKLLKVDGYE  
 Fut8Sinivicta 2 QEMWYVSAELNFKFKHIDEFTYDQRE--KEIQDVMKNAWEHKKSLIIDKLLKADGYN  
 Fut8Acephalotes 2 QEMWYVIAAELNFKFKHIDEFTYDQRE--KEIQDVIKNAWEHKKSLIIDKLLKSDGYD  
 Fut8AechinatioR 2 QEMWYVIAAELNFKFKHIDEFTYDQRE--KEIQDVIKNAWEHKKSLIIDKLLKSDGYD  
 Fut8Phumanus 2 QEFWYFYSQLEKLGDIK---RTSPELTKINNILKMTAEHKL SLMKDIINGLSKEDGFS  
 Fut8Smaritima NEMWLYTKNELKVLKTKMDDD-KT---KIKMDKMIRLETQYKRVILNDLATLSNIDGLG  
 Fut8Dpulex 2 QENWYFVQEQLEKLLKSGRD--QSAP EISNLIQEIILNSGKEHEI ILLNDIQELSNMENHD  
 Fut8Apisum KELWYVNSSELQSLVKEDDS-----VRVEHISKIKNIIGEHYRSLLDKDVSSLADVGH  
 Fut8Tcastaneum KEFWYFIHGLLDLEKKAH---ESAPEIVDSVKYLLSLGVEHKKRSLLDIDQLAEVDGYA  
 Fut8Dmojavensis AEIWNFFSSELGKLRKAVG---PGNSELEESIQQVLLQGADHKKRSLSDMEQLRRVDGYE  
 Fut8Dpseudoobscura GEIWNFFSSELAKISKVVAS--KGPKELEESINQVLLQGAEHKKRSLSDMDHMRSDGYE  
 Fut8Dananassae GEIWNFFSSELGKVRKAVAAG--HANTDLEETINQVLLQGAEHKKRSLSDMEHLRRSDGYE  
 Fut8Dmelanogaster GEIWNFFSSELGKVRKAVAAG--HASADLEESINQVLLQGAEHKKRSLSDMERMRQSDGYE  
 Fut8Agambiae QELWNFLQSEVTKVQKQAL---RSAP ELAKPLNAFLSLAADHKKRSLTDIRMRAADGYE  
 Fut8Aegypti QELWNLLHSETAKLAKTAR---RNTPEIYAPAENFLALAAEHKKRSLLDINQMRASDGYE  
 Fut8Cpipiens QELWNFLNSEVIKAAKIGR---KNSPEIAPPLDALLSLASEHKKRSLLDINQMRASDGYE

Fut8Cjaponica DRRKTLRSELASRIHKSIDLHLQNPSTCADAKTLLCNLDKECGFGCQLHHVTVCAITAFAT  
 Fut8Celegans EERFKQRTAITQRIFKSIIEKLQNPKACSEAKTLVCNLDKECGFGCQLHHVTVCAITAFAT  
 Fut8Chrenneri DERIKKRSEITNRMKSIKKLQNPKSCGEANTLVCNLDKECGFGCQLHHVTVCAITAFAT  
 Fut8Cremanei DERMSQRSEITNRIKLSIEKLQNPQSGDVNTLVCNLDKECGFGCQLHHVTVCAITAFAT  
 Fut8Asuum 2 KWREAAALATISAKIQSQLDRLQNPNDCTSARSLICHNLKGCQFGCQLHHVTVCFIVAYGT  
 Fut8Lloa 2 SWRANALANISAIQFNHFDMQNPDDCKSARILTCDLNKQCGFGCQLHHVTVCFIVAYGS  
 Fut8Bmalayi 2 SWRANALANISAIQFNHFNMQNPDDCKTARILTCDLNKQCGFGCQLHHVTVCFIVAYGS  
 Fut8Wbancrofti 2 SWRTNALANISAIQFNHFNMQNPDDCKTARILTCDLNKQCGFGCQLHHVTVCFIVAYGS  
 Fut8Tspiralis 1 QLRSE-----ARLQHLGNA-----VQEQLGFCQFGCQMHHVTVCLIVSYT  
 Fut8Turticae EWRKNEFKKLTFTSVVDKLNPPNCCATANKLVCRLNKGCGFGCQMHHVTVCMVVALAT  
 Fut8Hmagnipapillata EYKDSLALALELSNIVQKRIFTLQNPKNCDTAKKLVCSLNKGCQYGCQMHHVTVCFIVAYST  
 Fut8Nvectensis KWQWSEHEELSRIVQERIKKLQNPKDCSTSKKLIQNLKGCQYGCQVHHVTVCFIVAFGS  
 Fut8Moccidentalis 2 MWRKQEAEDLQRIQLDRIRVYLQNPADCSAKKLVFNLNKGCQYGCQLHHVTVCMIMATSM  
 Fut8CintestinalisA 0 EARGEAAARKLQDLVQKRINYLQNPKDCRSNRKLVCAIHKKCGFGCQLHHVTVCMMTAYGT  
 Fut8Lsalmonis AWRLQESKNLSLHVQSRILTALQNPSCDKNARKLLCNLNKGCQYGCQIHHVTVCFVSAIGA  
 Fut8SpurpuratusA 0 -----DGFVVRGHIGKXENPKDCSKAKKIVCNLNKGCQYGCQVHHVTVCMIVAYAT  
 Fut8Cteleata 0 EWRHREHEQLTELVTQRIKYLQNPKDCSKAKKLVFNLNKGCQYGCQLHHVTVCFIAYGT  
 Fut8SkowalevskiiA 0 MWRENAKELEQTVQKRLKYLQNPKDCSKAKKLVFNLNKGCQYGCQLHHVTVCLIMAYGS  
 Fut8Bfloridae 0 AWRQREAAHALQDLVQRRHLQNPKDCSKAKKLLCNLNKGCQYGCQLHHVTVCFMAYGT  
 Fut8Xtropicalis 0 DWREKEAKDLTDLVQRRITYLQNPKDCSKAKKLVFNLNKGCQYGCQLHHVTVCFMIAYGT  
 Fut8Rnorvegicus 0 DWREKEAKDLTELQRRITYLQNPKDCSKAKKLVFNLNKGCQYGCQLHHVTVCFMIAYGT  
 Fut8Hsapiens 0 DWREKEAKDLTELQRRITYLQNPKDCSKAKKLVFNLNKGCQYGCQLHHVTVCFMIAYGT  
 Fut8Btaurus 0 DWREKEAKDLTELQRRITYLQNPKDCSKAKKLVFNLNKGCQYGCQLHHVTVCFMIAYGT  
 Fut8Acarolinensis 0 DWREKEAKDLTDLVQRRITYLQNPKDCSKAKKLVFNLNKGCQYGCQLHHVTVCFMIAYGT  
 Fut8Ggallus 0 DWREKEAKDLTDLVQRRITYLQNPKDCSKAKKLVFNLNKGCQYGCQLHHVTVCFMIAYGT  
 Fut8Mgallopavo 0 DWREKEAKDLTDLVQRRITYLQNPKDCSKAKKLVFNLNKGCQYGCQLHHVTVCFMIAYGT  
 Fut8Tguttata 0 DWREKEAKDLTDLVQRRITYLQNPKDCSKAKKLVFNLNKGCQYGCQLHHVTVCFMIAYGT  
 Fut8DrerioB 0 EWRDKEARDLSILVQRRISFLQNPQDCSKARKLVFNLNKGCQYGCQLHHVTVCFMIAYGT  
 Fut8Trubipres 0 EWRMKEAKDLSDLVQNRITYLQNPDCSKARKLVFNLNKGCQYGCQLHHVTVCFMIAYGT  
 Fut8Oniloticus 0 EWRMKEAKDLSDLVQNRITYLQNPDCSKARKLVFNLNKGCQYGCQLHHVTVCFMIAYGT  
 Fut8Olatipes 0 DWRTKEAKDLSDLVQNRITYLQNPDCSKARKLVFNLNKGCQYGCQLHHVTVCFMIAYGT  
 Fut8Hmelpomene 0 EWRVTEAANVSDLVQRRILYLNQNPSCDKARKVICNLNKGCGFGCQLHHIVYCLIFAYAT  
 Fut8Dplexippus 0 DWRRSEASEVSDLVQKRLKYLQNPDCDKARKVICNLNKGCGFGCQLHHIVYCLIFAYAT  
 Fut8Bmori 0 EWRQLEAANVSDLVQRRILYLNQNPDCREARKLICNLNKGCGFGCQLHHIVYCLIFAYAT  
 Fut8Sfrugiperda 0 EWRQAEANVSDLVQRRILYLNQNPDCDKARKLICNLNKGCGFGCQLHHIVYCLIFAYAT  
 Fut8Msexta EWRQMEANVSDLVQRRILYLNQNPDCREARKLICNLNKGCGFGCQLHHIVYCLIFAYAT  
 Fut8Mrotundata EWRKKEAKDLSDLVQRRFKYLQNPSCDKARKLVCSLNKGCQYGCQIHHITYCFIVAYGT 0  
 Fut8Amellifera EWRKKEAKDLSDLVQRRFKYLQNPSCDKARKLVCSLNKGCQYGCQIHHITYCFIVAYGT 0  
 Fut8Bimpatiens EWRKKEAKDLSDLVQRRFRHLQNPSCDKARKLVCSLNKGCQYGCQIHHITYCFIVAYGT 0  
 Fut8Hsaltator 2 EWREKEAKDLSDLVQRRFRYLQNPDCDKAKKLVCSLNKGCQYGCQLHHITYCFMAYGT 0  
 FUT8Cfloridanus 2 EWRKKEAKDLSDLVQKRFYLQNPADCSAKKLIQNLNKGCGFGCQIHHITYCFIVAYGT 0  
 Fut8Sinivicta 2 EWREKEAKDLSDLVQRRFRYLQNPDCDKAKKLIQNLNKGCGFGCQIHHITYCFIVAYGT 0  
 Fut8Acephalotes 2 EWREKEAKDLSDLVQRRFRYLQNPDCDKAKKLIQNLNKGCGFGCQIHHITYCFIVAYGT 0  
 FUT8Aechinatior EWRKKEAKDLSDLVQRRFRYLQNPDCDKAKKLIQNLNKGCGFGCQIHHITYCFIVAYGT  
 Fut8Phumanus 0 SWRKSESASLAELEKRLKLLQNPEDCTTAKKLIQNLNKGCGFGCQIHHIAYCLIVAYAS  
 Fut8Smaritima 0 EWREREAKSLSDLVQRRHLQNPKDCDKNAKLLCNLNKGCQYGCQIHHVTVCFIVAYGS  
 Fut8Dpulex 0 AWRSTEARALSDDLQRRHLQNPADCSAKKLIQNLNKGCGYGCQIHHIAYCFIMAYAT  
 Fut8Apisum 0 AWRQQESENLSNLVQKRLHLLQNPSCDKARKLVCDLNKGCQYGCQLHHVTVCFIVAYAT  
 Fut8Tcastaneum 0 TWREKEANDLSGLVQKRFHFLQNPADCKTAKKLIQNLNKGCGYGCQLHHAVYCFMAYGT  
 Fut8Dmojavensis 0 AWRQEQAKDLSDLVQRRHLHLLQNPSCDKNAKLVCKLNKGCQYGCQLHHVTVCFIVAYAT  
 Fut8Dpseudoobscura 0 TWRHKEARDLSDDLQRRHLHLLQNPSCDKNAKLVCKLNKGCQYGCQLHHVTVCFIVAYAT  
 Fut8Dananassae 0 AWRHREAKESDLVQRRHLHLLQNPSCDKNAKLVCKLNKGCQYGCQLHHVTVCFIVAYAT  
 Fut8Dmelanogaster 0 AWRHKEARDLSDDLQRRHLHLLQNPSCDKNAKLVCKLNKGCQYGCQLHHVTVCFIVAYAT  
 Fut8Agambiae AWRHREAADLSELVQKRLTRLQNPENCSARKLICRLNKGCGYGCQLHHVTVCFIMAYAT  
 Fut8Aegypti FWRYKESKDLSDLVQKRLTHLQNPEDCSARKLICRLNKGCGYGCQLHHVTVCFIMAYAT  
 Fut8Cpipiens FWRYKESKDLSDLVQRRLSYLQNPEDCSARKLVCRNLKGCQYGCQLHHVTVCFIMAYAT

i4c

Cystein-rich domain

i4l

\* \*\*:\*:\*:\*:\* \* : \* : \*

Fut8Cjaponica QRMLILRRDQSWKYSAR-----GWTSVFKPISKCSYDEA--VGKT-----DLKP 0  
 Fut8Celegans 2 QRMMVLKRDGSSWKYSSH-----GWTSVFKKLSKCSFDEA--VGNT-----EAKP 0  
 Fut8Chrenneri 2 KRMLILKRDGSSWKYSSR-----GWTSVFEPISKCSFDEA--VGKT-----ELKP 0  
 Fut8Cremanei 2 KRMMILKRDGSSWKYSSR-----GWTSVFEPISKCSFDDA--VGKA-----EMKP 0  
 Fut8Asuum NRTLILLHDGRDWNYSKG-----GWTA AFLPISRCKHADV--SKD--EGNEEWS 0  
 Fut8Lloa NRTLVLTDGRTWNYATN-----GWTA AFLPITKCSFSEI--FKP--NEYADDWGT 0  
 Fut8Bmalayi NRTLVLTDGRTWNYAAN-----GWNA AFLPITKCSFSEI--FKVTLNENADDWGI 0  
 Fut8Wbancrofti NRTLVLTDGRTWNYAAN-----GWNA AFLPITKCSFSEI--FKVTARFPKD--- 0  
 Fut8Tspiralis NRTMILRGD--RWYS SSR-----GWTSVFKPLSETCTEAE-----DVPPSMFTA 0  
 Fut8Turticae KRTMILDSN--NWRYPNPNAHGSREPSWNLIFQPLSRTCTTAD-----GKTHKPWSE 0  
 Fut8Hmagnipapillata GRTMIIDSS--GWRYSSK-----GWDA YFES-VTSCCKDFQ-----E-A-KEWGY 0  
 Fut8Nvectensis QRTMIIDST--GWRYSSS-----GWSGIFLQPSETCTSYT-----G-GFSNWQR 0  
 Fut8Moccidentalis KRTLILQSK--GWRYNPR-----GYEDIFQPVSNSCIAET-----GGRSRKYPA 0  
 Fut8Cintestinalis GRTMILVSK--LWLYNPG-----GWEEIFEPLSATCTQTF-----NFKPQVWRG 1  
 Fut8Lsalmonis GRALVLKSK--GWRYNRA-----GFENVFKPLSETCQRIPEVLQGELPLSRSSWPG 1  
 Fut8SpurpuratusA ERTLILDSK--GWRYARE-----GWKFFLPLSETCLDRK-----GESSGRWGA 0  
 Fut8Cteleta QRTFVLESR--GWRY SSE-----GWKEYFLPLSETCTDRQ-----GDSSRAWGG 0  
 Fut8SkowalevskiiA ERTLILES K--GWRYAKD-----GWKFFQPLSNTCVTIT-----GTSRNAWTE 1  
 Fut8Bfloridae ERTMILNSQ--GWRYSSG-----GWKVFPLPLSETCTDPS-----GSSRGPWKG 1  
 Fut8Xtropicalis QRTLILESQ--SWRYATG-----GWETVFKPVSETCTDRS-----GSSTGHWSG 1  
 Fut8Rnorvegicus QRTLILESQ--NWRYPATG-----GWETVFRPVSETCTDRS-----GLSTGHWSG 1  
 Fut8Hsapiens QRTLILESQ--NWRYPATG-----GWETVFRPVSETCTDRS-----GISTGHWSG 1  
 Fut8Btaurus QRTLILESH--NWRYPATG-----GWETVFRPVSETCTDRS-----GVSTGHWSG 1  
 Fut8Acarolinensis QRTLILESQ--NWRYPATG-----GWETVFRPVSETCTDRS-----GSTTGHWSG 1  
 Fut8Ggallus QRTLILESQ--NWRYPATG-----GWETVFRPVSETCTDRS-----GTTTGHWSG 1  
 Fut8Mgallopavo QRTLILESQ--NWRYPATG-----GWETVFRPVSECTDRS-----GTTTGHWSG 1  
 Fut8Tguttata QRTLILESQ--NWRYPATG-----GWETVFRPVSETCTDRA-----GSSSTGHWSG 1  
 Fut8DrerioB QRVLILESH--NWRYPAPK-----GWETVFKAVSETCTDRS-----GATTGHWSG 1  
 Fut8Trubipres QRTLILESH--NWRYPAPG-----GWETVFLPVSNCTDRS-----GATTGHWSG 1  
 Fut8Oniloticus QRTLILESH--NWRYPAPG-----GWETVFLPVSNCTDRS-----GATTGHWSG 1  
 Fut8Olatipes QRTLILESH--NWRYPAPG-----GWETVFLPVSNCTDRS-----GASTGHWSG 1  
 Fut8Hmelpomene ERTLILNSK--GWRYNNK-----GWYVFPISDTCVSVY-----DDKVVPWPA 1  
 Fut8Dplexippus ERTLILNSK--GWRYNNK-----GWYVFPISDTCCTAY-----DDKVVPWPA 1  
 Fut8Bmori ERTLILNSK--GWRYNTK-----GWYVFPISSECLSSY-----DDKVVPWPV 1  
 Fut8Sfrugiperda ERTLILNSK--GWRYNNK-----GWYVFPISDTCCTAY-----DDKVVPWPV 1  
 Fut8Msexta ERTLILNSK--GWRYNTK-----GWDYVFPISDSCCTAY-----DDKVVPWPV 1  
 Fut8Mrotundata ERTLIIKSK--GWRYHKD-----GWESVFKPLSDTCVSTN-----GASHANWPG 1  
 Fut8Amellifera ERTLIIKSK--GWRYHKD-----GWESVFKPLSDTCVSTN-----GASHANWPG 1  
 Fut8Bimpatiens ERTLIIKSK--GWRYHKD-----GWESVFKPLSETCVSTI-----GASHANWPG 1  
 Fut8Hsaltator ERTLIIKSK--GWRYHKD-----GWESVFKPLSDTCVSTN-----GVSHSNWPG 1  
 FUT8Cfloridanus ERTLIIKSK--GWRYOKE-----GWESVFKPLSNTCLSTT-----GVSHSNWPG 1  
 Fut8Sinivicta ERTLIMKSK--GWRYHKD-----GWESVFKPLSDNCLSTT-----GTSHSNWPG 1  
 Fut8Acephalotes ERTLIMKSK--GWRYHKD-----GWESVFKPLSDTCLSTT-----GTSHSNWPG 1  
 FUT8Aechinatio ERTLIMKSK--GWRYHKD-----GWESVFKPLSDTCLSTS-----GTSHSNWPG 1  
 Fut8Phumanus KRTLILTSK--GWRYHKS-----GWEDIFLPLSDTCRSPS-----GASRVGWPG 1  
 Fut8Smaritima GRTLILNSK--GWRYNKD-----GWESVFKPVSDSCTSTM-----GVGSAMWPG 1  
 Fut8Dpulex KRTLILNSK--KWRYHRG-----GWKVFPLPLSDTCTDPS-----GLDRSNWPG 1  
 Fut8Apisum ERTLILRSK--GWRYSKG-----GWQDVFLPLSDTCLLPN-----GETTNRWPG 1  
 Fut8Tcastaneum KRTLILKSK--GWRYHKA-----GWEEIFKPVSDTCVDPS-----GKSVSNWPG 1  
 Fut8Dmojavensis ERTLILKSR--GWRYHKG-----GWEEVFRPVSDNCQDAG-----TAYAYNWPG 1  
 Fut8Dpseudoobscura ERTMILKSR--GWRYHKG-----GWEEVFPISKGCHDAG-----SANAYNWPG 1  
 Fut8Dananassae ERTLILKSR--GWRYHKG-----GWEEVFPVSNCHDAG-----TANTYNWPG 1  
 Fut8Dmelanogaster ERTLILKSR--GWRYHKG-----GWEEVFPVSNCHDAG-----TANTYNWPG 1  
 Fut8Agambiae ERTLILKSK--GWRYHKA-----GWEEVFPISDTCCLDSN-----GASHASWPG 1  
 Fut8Aegypti ERTLVLKSK--GWRYHKA-----GWEEVFPISDTCCLSDA-----GATHASWPG 1  
 Fut8Cpipiens ERTLILKSK--GWRYHKA-----GWEEVFPISDTCCLDAN-----GATHASWPG 1

i51

\* :: \* \* . : \*

Fut8Cjaponica 2 FTENSPARVLSLGIIVDSLITK--PEFLPQAVPQILRNLTAIHSHPPAFFVGTFFISYLMR 0  
 Fut8Celegans 2 FAEPSPARVSLGIIVDSLITK--PTFLPQAVPEQLLESLTSLHSHPPAFFVGTFFISYLMR 0  
 Fut8Chrenneri 2 FTDPSPARVSLGIIVDSLITK--PTFLPQAVPEQLLGNLTALHSHPPAFFVGTFFISYLMR 0  
 Fut8Cremanei 2 FADPSPERVSLGIIVDSLITK--PAFLPQAIPEQLLSTLSSLHSHPPAFFVGTFFISYLMR 0  
 Fut8Asuum VAMSARSRVVKLPIIDGLHGR--PPFLPLAFPEFLASDLLKLSNPPVFFISQFLRYLMR 0  
 Fut8Lloa GKHYRNKRIVKLPIDSLAFR--PPYLPLAIPQSYSEDELLKLSNPPAFFISQFIRYLMR 0  
 Fut8Bmalayi GEHYKDKRIVKLPIDSLQR--PAYLPLAIPQLYSAELOKLSNSPAFFISQFIRYLMR 0  
 Fut8Wbancrofti 0 FSHYRDKRIVKLPIDSLQR--PPYLPLAIPQLYSAELOKLSNSPVPFFISQFIRYLMR 0  
 Fut8Tspiralis 1 EGDLLKKSFLVDAPVIDIFDKEQYPLPLSFPKELADELLQVHSYPPVWVWIGQFVRYLMR 2  
 Fut8Turticae 0 GV---TAQVVDLPIIDSLRPR--MDYLPRAIPEQISEKLITLHGSPVWFMGQILGFIMR  
 Fut8Hmagnipapillata DH--ASHQVVHLPIVDALFPR--PSQMPQAVPKDLFDQIRMFHGHPPFVWVWIGQFCKFLFK  
 Fut8Nvectensis -N--NDAQNVILPIVDLSLPR--PPYMPMAVPEDLADRLSRLHGHPPFVWVWIGQFAKYLFK  
 Fut8Moccidentalis 0 SG--DEVVNLEMPIDIGLITQK--PDCLPLAVPKALVPRLSQLHANPALWWSIQIVGLFQR  
 Fut8CintestinalisA ELESANELEVMLPAVDQLPKA--PRFAPLGIPEDLADELQDFHSGPQVWVWVGFQIKYIFR  
 Fut8Lsalmonis KE---DTVNVDIPIVDSVNPR--PKHLPPSIPKEIASRIIRLHGDPVWVWVSEVLRYLIR  
 Fut8SpurpuratusA PSNIEHLQVVELPIVDGLHPR--PEFLPLAIPEDISQRLMRIHGHPVWVWVGMQIMTYIQR  
 Fut8Cteleta 0 KKRLLTYVQVVDLPIIDSLRPR--PPFMPQAIADLAPRLMRMHGHPFVWVWVIAQFLTYLTR  
 Fut8SkowalevskiiA ESRIKDVQVVDLPIVDGLHPR--PNYLPLAIPEDLSERLLRLHGHQPAVWVWVIAQFVKYVTR  
 Fut8Bfloridae EK-SKDTQVVEMPVDSIYPR--PPYLPLGIPEDLSRLLRLHGNPSVWFIAQFVLYLQR  
 Fut8Xtropicalis EANDKNVQVVELPIVDLSLHPR--PPYLPLGVPEDLADRLIRLHGDPVWVWVQFVKYLIR  
 Fut8Rnorvegicus EVNDKNIQVVELPIVDLSLHPR--PPYLPLAVPEDLADRLVRVHGDPVWVWVQFVKYLIR  
 Fut8Hsapiens EVKDKNVQVVELPIVDLSLHPR--PPYLPLAVPEDLADRLVRVHGDPVWVWVQFVKYLIR  
 Fut8Btaurus EIKDKNVQVVELPIVDLSLHPR--PPYLPLAVPEDLADRLVRVHGDPVWVWVQFVKYLIR  
 Fut8Acarolinensis ETNDKDVQVIELPIVDLSLHPR--PPYLPLAIPEDLADRLIRVHGDPVWVWVQFVKYLIR  
 Fut8Ggallus ETNDKDVQVVELPIVDLSLHPR--PPYLPLAVPEDLADRLIRVHGDPVWVWVQFVKYLIR  
 Fut8Mgallopavo EANDKDVQVVELPIVDLSLHPR--PPYLPLAVPEDLADRLIRVHGDPVWVWVQFVKYLIR  
 Fut8Tguttata EANDKDVQVVELPIVDLSLHPR--PPYLPLAVPEDLADRLIRVHGDPVWVWVQFVKYLIR  
 Fut8DrierioB EAHDRDVQVVELPIVDLSLHPR--PPYLPLAVPEDLAPRLQRLHGDPVWVWVQFVKFLVR  
 Fut8Trubipres EAHDKDVQVVELPIVDLSLHPR--PPYLPLAIPEDLAPRLQRLHGDPVWVWVQFVKYLVR  
 Fut8Oniloticus EAHDKDVQVVELPIVDLSLHPR--PPYLPLAIPEDLAPRLQRLHGDPVWVWVQFVKYLVR  
 Fut8Olatipes EAHDKDVQVVELPIVDLSLHPR--PPYLPLAIPEDLAPRLHRLHGDPVWVWVQFVKYLVR  
 Fut8Hmelpomene SY---DAKVVSLPFIIDSLISQK--PKFLPLAIPSDLAHRIVRFNGDPPSSWVWIGQMLKYVLK 2  
 Fut8Dplexippus SY---DAKVVSLPFIIDSVSQK--PKFLPLAVPSDLAHRIVRFNGDPPSSWVWIGQMLKYVLK 2  
 Fut8Bmori SY---DAKVVSLPFIIDSLISQK--PKFLPLAVPKDLAHRIVRFNGDPPSSWVWIGQMLKFLK 2  
 Fut8Sfrugiperda TY---DAKVLALTFIIDSLISQK--PKFLPLAIPKDLAHRITRFNGDPPSSWVWIGQMLKYILK 2  
 Fut8Msexta LY---DAKVVSLPFIIDSLISQK--PKFLPLAIPKDLAPRIVRFNGDPPSSWVWIGQMLKYILK  
 Fut8Mrotundata DA---SKQVISLPIVDNVYPK--PRYQPPSVPEDLAPRLEKHLHGHPVWVWVQVVKYLMR  
 Fut8Amellifera DS---SKQVISLPIVDNVYPK--PRYQPPSVPADLASRLEKHLHGHPVWVWVQVVKYLMR  
 Fut8Bimpatiens DS---SKQVISLPIVDNVYPK--PRFQPPSVPADLASRLEKHLHGHPVWVWVQVVKYLMR  
 Fut8Hsaltator DP---TKQVISLPIVDNVYPK--PKYQAPSVPADLAARLEKIHGHPVWVWVQVVKYLMR  
 FUT8Cfloridanus DP---SKQVISLPIVDNVYPK--PRFQPPSVPADLAPRLEKIHGHPVWVWVQVVKYLMR  
 Fut8Sinivicta DP---SKQVISLPIVDNVYPK--PRFQPPSVPADLAPRLEKIHGHPVWVWVQVVKYLMR  
 Fut8Acephalotes DP---SKQVISLPIVDNVYPK--PRFQPPSVPADLAPRLEKIHGHPVWVWVQVVKYLMR  
 FUT8AechinatioR DP---SKQVISLPIVDNVYPK--PRFQPPSVPADLAPRLEKIHGHPVWVWVQVVKYLMR  
 Fut8Phumanus QS---DSQVVVLPIDITLFR--PEFLPPIPKDLAPRLIKLHSQPLAWWIGQMLRYLMR  
 Fut8Smaritima YG---DAQVLDLPIIDSLISPR--PDYLPALPRDLAARMQRLHGDPVWVWVQFLKYLLR  
 Fut8Dpulex TN---ETQVIELPIVDMLSPR--PPFLPLAIPRDLSEMIIRLHGDPVWVWVQFVKYLLR  
 Fut8Apisum HR---NTQVITLPIIDSLNPR--PPFLPLALPEDLAPRLNVLHGDPVWVWVQFLKYLLR  
 Fut8Tcastaneum NS---ETQVVNLPIDSLISPR--PPFLPLAIPEDLAPRLTRLHGDPVWVWVQILKFLLR  
 Fut8Dmojavensis KP---NTQVLVLPIDSLMPR--PPYLPLAVPEDLAPRLKRLHGDPVWVWVQFLKYLLR  
 Fut8Dpseudoobscura KP---NTQVLVLPIDSLMPR--PPYLPLAVPEDLAPRLKRLHGDPVWVWVQFLKYLLR  
 Fut8Dananassae KP---NTQVLVLPIDSLMPR--PPYLPLAVPEDLAPRLKRLHGDPVWVWVQFLKYLLR  
 Fut8Dmelanogaster KP---NTQVLVLPIDSLMPR--PPYLPLAVPEDLAPRLKRLHGDPVWVWVQFLKYLLR  
 Fut8Agambiae QS---NTQVLTLPIDSLNPR--PPYLPLAIPADLAPRLMKLHGDPVWVWVQFLKYLLK  
 Fut8Aegypti TP---ETQVLTVPIDSLNPR--PPYLPLAIPADLAPRLIKLHGDPVWVWVQFLKYLLK  
 Fut8Cpipiens TT---ETQVLTVPIDSLNPR--PPYLPLAIPADLAPRLMKLHGDPVWVWVQFLKYLLK

i6l

: \* : ..\* : ... : : :



|                        |                             |                  |    |                         |
|------------------------|-----------------------------|------------------|----|-------------------------|
| Fut8Cjaponica          | FNVETIEKLEAAVQS--MKL        | SRGPIVGLQIRRTDKV | GT | EAAFHALKEYMEWTEIWFKVEE  |
| Fut8Celegans           | FNSATQEKLDKALKS--IPLDKG     | PIVGLQIRRTDKV    | GT | EAAFHALKEYMEWTEIWFKVEE  |
| Fut8Chrenneri          | FNSDTKEKLEEA VKA--IPFDKGP   | PVGLQIRRTDKV     | GT | EAAFHALKEYMEWTEIWFKVEE  |
| Fut8Cremanei           | FNAETKEKLEAALKA--IPFSEGP    | PVGLQIRRTDKV     | GT | EAAFHALKEYMEWAEIWFKIEE  |
| Fut8Asuum              | 1 PNDELAKRITEAASK--VPFNKGP  | PVGLQIRRTDKV     | GT | EAAFHALPEYMKWTEYWFQIEE  |
| Fut8Lloa               | 1 PSAVFAKEIDQAVKK--VPFDKGP  | PIVGLQIRRTDKI    | HT | EASFHDLDEYIKWAEDWFKIEE  |
| Fut8Bmalayi            | 1 PSAVFAKEIDLAVKK--VPFDKGP  | PIVGLQIRRTDKI    | HT | EASFHDLDEYMKWAEDWFKIEE  |
| Fut8Wbancrofti         | 1 PSAVFAKEIDLAVKK--VPFDKGP  | PIVGLQIRRTDKI    | HT | EASFHDLDEYMKWAEDWFKIEE  |
| Fut8Tspiralis          | 2 FVDSVKLDDLDEKLET--YGF-RHP | PIVGIHVRRTDKI    | LS | EASFHSVKEYMEEVENWYDVQM  |
| Fut8Turticae           | PSQEMKKFLENACKR--FKF-RSP    | IIGIHVRRTDKV     | GT | EASYHSLTEYMKYAEQYFQNL   |
| Fut8Hmagnipapillata    | 2 YKPDLOREITEKKKS--LGF-KSP  | IVGVQIRRTDKI     | IN | EAAHYDIDEYMWVDLYYKLLA   |
| Fut8Nvectensis         | 2 YNANVQKEINEKRER--MGF-KSP  | IVGIQVRRTDKI     | IN | EAAHVEVEEYMWVQLYYSRLG   |
| Fut8Moccidentalis      | 0 PQRGTSDFLKEVRDH--HGI-KCP  | YAGIHVRRTDKI     | GT | EADYHGIDEYMSWVAEYFDKYE  |
| Fut8CintestinalisA     | 2 PRPWLKELDGYEVT--VDY-STP   | IVGVHVRRTDKI     | IG | EASFHAIDEYMKHVDDWDFDRYD |
| Fut8Lsalmonis          | PQEDLQVLLNSTEEDKLPD--KSP    | PVGIHVRRTDKV     | GT | EAAHFHVEEYMEYVEERFKYLD  |
| Fut8SpurpuratusA       | 2 PQUALQEDIDKMSQA--LGF-TNP  | IVGLHVRRTDKV     | GT | EAAFHGIEEYMFHAEFFYLRLE  |
| Fut8Cteleta            | 2 LQPAFQRDIDDDVSHS--LGF-KCP | IVGVHVRRTDKV     | GT | EAAFHGLDEYMIYVEEYFNLE   |
| Fut8SkowalevskiiA      | 2 PQQVLOSFLDETRNK--VKF-ENP  | IVGVHVRRTDKV     | GT | EAAFHNIIDEYMVHVEEYKRLS  |
| Fut8Bfloridae          | 2 YQPYLQODIEETAQK--LGF-KHP  | IVGIHVRRTDKI     | IN | EAAHYHSIAEYMEWVEEYQLLQ  |
| Fut8Xtropicalis        | 2 PQQWLEKEIEESTKK--LGF-KHP  | IVGVHVRRTDKV     | GT | EAAHFPIEEYMVHVEEHFQLLA  |
| Fut8Rnorvegicus        | 2 PQQWLEKEIEEATK--LGF-KHP   | IVGVHVRRTDKV     | GT | EAAHFPIEEYMVHVEEHFQLLA  |
| Fut8Hsapiens           | 2 PQQWLEKEIEEATK--LGF-KHP   | IVGVHVRRTDKV     | GT | EAAHFPIEEYMVHVEEHFQLLA  |
| Fut8Btaurus            | 2 PQQWLEKEIEEATK--LGF-KHP   | IVGVHVRRTDKV     | GT | EAAHFPIEEYMVHVEEHFQLLA  |
| Fut8Acarolinensis      | 2 PQQWLEKEIEEATR--LGF-KHP   | IVGIHVRRTDKV     | GT | EAAHFPIEEYMIHVEERFQLLA  |
| Fut8Ggallus            | 2 PQQWLEKEIEEATR--LGF-KHP   | IVGVHVRRTDKV     | GT | EAAHFPIEEYMVHVEERFELLA  |
| Fut8Mgallopavo         | 2 PQQWLEKEIEEATR--LGF-KHP   | IVGVHVRRTDKV     | GT | EAAHFPIEEYMVHVEERFELLA  |
| Fut8Tguttata           | 2 PQQWLEKEIEEATR--LGF-KHP   | IVGVHVRRTDKV     | GT | EAAHFPIEEYMVHVEERFELLA  |
| Fut8DrerioB            | 2 PQAWEKEIQETCLK--LGF-KHP   | IIGVHVRRTDKV     | GT | EAAHFPIEEYMVHVEEQFSMA   |
| Fut8Trubipres          | 2 PQAWEKEIQOSTAK--LGF-KHP   | IVGVHVRRTDKV     | GT | EAAHFPIEEYMIHVEEQFQLLA  |
| Fut8Oniloticus         | 2 PQAWEKEIQOTTAK--LGF-KHP   | IIGVHVRRTDKV     | GT | EAAHFPIEEYMLHVEEQFQLLA  |
| Fut8Olatipes           | 2 PQGWLEKEIQOSTAK--LGF-KHP  | IIGVHVRRTDKV     | GT | EAAHFPIEEYMLHVEEQFQLLA  |
| Fut8Hmflopomene        | 2 PKEETQKAINETIAK--LNF-KNP  | IVGVHVRRTDKV     | GT | EAAFHHLHEYMQHVQHYEQQLQ  |
| Fut8Dplexippus         | 2 PRAAMQKAINETIAK--MNF-KNP  | IVGVHVRRTDKV     | GT | EAAFHHLHEYMQHVQHYEQQLQ  |
| Fut8Bmori              | 2 PRLPMQKAINDTIAK--MNF-KSP  | IVGVHVRRTDKV     | GT | EAAFHHLHEYMAHVVDYDQLE   |
| <u>Fut8Sfrugiperda</u> | 2 PRQAMQKAINDTIAK--MNF-KKP  | IVGVHVRRTDKV     | GT | EAAFHHLHEYMAHVVDYDQLE   |
| Fut8Msexta             | PRVAMQKAINETIAK--MNF-KTP    | IVGVHVRRTDKV     | GT | EAAFHHLHEYMAHVVDYDQLE   |
| Fut8Mrotundata         | PQEHVTKTLNYAKDR--LGF-KKP    | IVGIHVRRTDKV     | GT | EAAHYDIDEYMKVVEQYFDELE  |
| Fut8Amellifera         | PQEHVKKMLDDAKER--LGF-KKP    | IVGIHVRRTDKV     | GT | EAAHYDIDEYMIKVQYFDELE   |
| Fut8Bimpatiens         | PQEHVKRTLENAKEK--LGF-KKP    | IVGVHVRRTDKV     | GT | EAAHYDIDEYMKVVEQYFDELE  |
| Fut8Hsaltator          | PQDHVKKTLEKAKEK--LGF-KKP    | PVGVHVRRTDKV     | GT | EAAHYDIDEYMTKVEQYFDELE  |
| FUT8Cfloridanus        | PQDHVKKTLEKAKER--LGF-KKP    | IVGVHVRRTDKV     | GT | EAAHYDIDEYMSKVEQYFDELE  |
| Fut8Sinivicta          | PQDHVKKTLEKAKER--LGF-KKP    | IVGIHVRRTDKV     | GT | EAAHYDIDEYMTKVEQYFDEFE  |
| Fut8Acephalotes        | PQDHVKKTLEKAKER--LGF-KKP    | IVGVHVRRTDKV     | GT | EAAHYDIDEYMIKVEQYFDELE  |
| FUT8Aechinator         | PQDHVRRTLEKAKER--LGF-KKP    | IVGIHVRRTDKV     | GT | EAAHYDIDEYMIKVEQYFDELE  |
| Fut8Phumanus           | 2 PQQPSTEKFNFESINK--LNF-KKP | IVGVHVRRTDKI     | IG | EADFHSIEEYMKHVGDWDFDQOI |
| Fut8Smaritima          | 2 PQQNLQANIDEMTDK--LGF-KKP  | IVGIHVRRTDKV     | GT | EAAFHKLHEYMLHAGEFYQQLA  |
| Fut8Dpulex             | 2 YQPETQKMLDQAKEK--MKF-ESP  | PVGVHVRRTDKV     | GT | EAAFHHSIDEYMLYVADFFDKLE |
| Fut8Apisum             | 2 PQQATSNKLDYEGKK--VKF-QKP  | IVGVHVRRTDKV     | GT | EAAFHKLDEYMVHVEYQYKYKE  |
| Fut8Tcastaneum         | 2 PQQPQTAAVMQETMTH--MGF-KRP | IVGVHVRRTDKV     | GT | EAAHYGIEEYMTAVDEYYKELE  |
| Fut8Dmojavensis        | 2 PQTETRDFLNSGMRK--LGW-ERP  | IVGVHVRRTDKV     | GT | EAAFHGIDEYMTHVDEYYRTLE  |
| Fut8Dpseudoobscura     | 2 PQQPTREFLFAGMRN--LGW-ERP  | IVGVHVRRTDKV     | GT | EAAACHSIGEYMTHVDEYYRTLE |
| Fut8Dananassae         | 2 PQTTRDFLTAGMRN--LGW-ERP   | IVGVHVRRTDKV     | GT | EAAACHSVEEYMTHVDEYYRTLE |
| Fut8Dmelanogaster      | 2 PQPTRDFLTSGMRN--LGW-ERP   | IVGVHVRRTDKV     | GT | EAAACHSVEEYMTYVEDYYRTLE |
| Fut8Agambiae           | 2 PTGETRQMLENGIER--LGF-KKP  | IVGVHVRRTDKV     | GT | EAAFHGIEEYMTAVDDYDQLE   |
| Fut8Aegypti            | 2 PTGETRQMLENGIEK--LGF-KKP  | IVGVHVRRTDKV     | GT | EAAFHGIEEYMQAVDDYDQVE   |
| Fut8Cpipiens           | 2 PTGETRQMLENGMEK--LGF-RKP  | IVGVHVRRTDKV     | GT | EAAFHGIEEYMAVDDYDQVE    |

2

Motif I

i71

: \* \* \* \* \* : \* \* \* : \* \* :

|                        |   |                                                                |
|------------------------|---|----------------------------------------------------------------|
| Fut8Cjaponica          | 2 | RRQ-----GTPLSRRIFIASDDPTVVPEAKLNYP--DYEVLGSTEIAQTAQ-LNNRYTDA   |
| Fut8Celegans           |   | KRQ-----GKPLERRIFIASDDPTVVPEAKNDYP--NYEVYGSTIEIAKTAQ-LNNRYTDA  |
| Fut8Chrenneri          | 2 | KRQ-----GKPLKRRIFIASDDPTVVPEAKNDYP--DYEVEFGSTEIAKTAQ-LNNRYTDA  |
| Fut8Cremanei           | 2 | RRQ-----GKPLKRMVFIASDDPTVVPEAQNYP--EYKVGSTEIAKTAQ-LNNRYTDA     |
| Fut8Asuum              | 2 | YRI-----GRSIQRRIYIATDDPSVFAEAKKYS--NYEVYGDVAIADSAQ-TRKRYSSD    |
| Fut8Lloa               | 2 | YRI-----GSSVKRRIYIATDDPEIFDELLMKYP--NYEYIGDPKISKMAQ-VHSRYTIE   |
| Fut8Bmalayi            | 2 | YRT-----RLSVKRRYIYIATDDPEVDFEVLTKYP--NYEYIGDPKISNMAQ-VHSRYTVE  |
| Fut8Wbancrofti         | 2 | YRT-----RLSIKRRIYIATDDPEVDFEVLTKYP--NYEYIGDPKISNMAQ-VHSRYTVE   |
| Fut8Tspiralis          |   | LHN-DSFLPAGGKRAVYVATDDPTVFDLTKREYP--NYLFIGSYEVAKSAT-AQKRYTDA   |
| Fut8Turticae           | 0 | IYQORSKNDKIERLIYLATDDTNIWREI KPFEEKGFTFIGDSQIAQSAG-LTSRYSLD    |
| Fut8Hmagnipapillata    | 2 | ISK-----PFDKRRVFASDDTSVLIEAKKYP--EYEFLLSDSGVSESAK-VSRRYSDE     |
| Fut8Nvectensis         | 2 | LNQ-----AIDSKRVYVASDDPSVFPPELQRYKYP--DYTFISDQDISKSAG-IASRYSDA  |
| Fut8Moccidentalis      |   | AIH-----GPLDKRRVYIATDDASVLKDAAKLFP--DYEFSGDQDIAKSAA-LKSRYSVE   |
| Fut8CintestinalisA     | 2 | QQRNS-QQEPTRRRVYLATDDPTLLPLAKAKFP--HYTFVSVFVHSRTAGSLFHRYS TD   |
| Fut8Lsalmonis          | 2 | ASL-----GSNVERRVYVASDDPRVLVECRKFFP--HYSFYGDATVARSA-VSSRYS SD   |
| Fut8SpurpuratusA       | 2 | RRQ-----EVPVRKIYLATDDASLLKEAERKYP--KYTFVSDNAISKSAG-LSSRYS ED   |
| Fut8Cteleata           | 2 | KSQ-----SIEQRAIYLATDDPNLHTEAKTKYP--NYKIIIGESEFSKSAG-LSSRYT DN  |
| Fut8SkowalevskiiA      | 2 | RIR-----DVPKIRVYLATDEPKLLSEAKQKFP--DYIFVSDNDISRTAG-LGQRYSEE    |
| Fut8Bfloridae          | 2 | KTQ-----EVKRRVYLATDEPNLLTEAQKQYP--EYDFVSDNAISKSAG-LSSRYT DS    |
| Fut8Xtropicalis        | 2 | RRM-----QIDKRRVYLATDDPTLLQEAQAKYP--QYEFISDNSISWSAG-LHNRYTEN    |
| Fut8Rnorvegicus        | 2 | RRM-----QVDKRRVYLATDDPALKEAKTKYS--NYEFISDNSISWSAG-LHNRYTEN     |
| Fut8Hsapiens           | 2 | RRM-----QVDKRRVYLATDDPSLLKEAKTKYP--NYEFISDNSISWSAG-LHNRYTEN    |
| Fut8Btaurus            | 2 | RRM-----QVDKRRVYLATDDPSLLKEAKTKYP--HYEFISDNSISWSAG-LHNRYTEN    |
| Fut8Acarolinensis      | 2 | RRM-----HIDKRRVYLATDDPSLLQEAQSKYS--DYEFISDNSISWSAG-LHNRYTEN    |
| Fut8Ggallus            | 2 | RRM-----HVDKRRVYLATDDPSLLQEAQSKYP--NYEFISDNSISWSAG-LHNRYTEN    |
| Fut8Mgallopavo         | 2 | RRM-----HVDKRRVYLATDDPSLLQEAQSKYP--NYEFISDNSISWSAG-LHNRYTEN    |
| Fut8Tguttata           | 2 | RRM-----HVDKRRVYLATDDPSLLQEAQSKYP--NYEFISDNSISWSAG-LHNRYTEN    |
| Fut8DrerioB            | 2 | QRG-----HVDKRRVYLATDDPALLQEAQTKYT--DYEFISDNSISWSAG-LHNRYTEN    |
| Fut8Trubripres         | 2 | RRV-----HVDKRRVYLATDDPSLLQEAQSKYP--EYEFISDNSISWSAG-LHNRYTEN    |
| Fut8Oniloticus         | 2 | RRA-----HVDKRRVYLATDDPSLLQEAQTKYP--DYEFISDNSISWSAG-LHNRYTEN    |
| Fut8Olatipes           | 2 | RRV-----RVDKRRVYLATDDPSLLQEAQTKYP--DYEFISDNSISWSAG-LHNRYTEN    |
| Fut8Hmlepomene         | 0 | LSR-----EVDARRVYLATDDAAVLEEAARKKYP--TYTILGDAGVAQTAA-THRRYS PQ  |
| Fut8Dplexippus         | 0 | MTK-----HVDKRRVYLATDDANVLQDARNKYK--EYEFLLGDPPIAKTAA-THRRYT PL  |
| Fut8Bmori              | 0 | LTR-----PVDVRRVYLATDDANVLDDARQKYP--EYTFLLGDPPIAKTAA-THRRYT PL  |
| <u>Fut8Sfrugiperda</u> | 0 | LTR-----PVAVRRVYLATDDANVLEDAKSKYP--SYEFLGDASIAKTAA-THRRYT PL   |
| Fut8Msexta             |   | LTR-----TVDARRVYLATDDANVLEDAKSKYP--EYTFLLGDASIAKTAA-THRRYT PL  |
| Fut8Mrotundata         |   | VKP-----DVRRVFLASDDPKVITTARNRYS--NYEIIIGDPEIAEMAS-VAKRYS DS    |
| Fut8Amellifera         |   | TKP-----EVRRVFLASDDPKVITTARNRYS--NYEIIADPEIAETAS-VAKRYS DS     |
| Fut8Bimpatiens         |   | PKP-----EVRRVFLASDDPKVITTARNRYS--NYEIIIGDPEIAETAS-VAKRYS DS    |
| Fut8Hsaltator          |   | TKP-----DARRVFLASDDPKVITTARKNYP--NYVIIIGDPEIAETAS-VAKRYS DS    |
| FUT8Cfloridanus        |   | TKP-----DVKRVFLASDDPKVITTARKRYT--NYEIIIGDPDIAETAS-VAKRYS DV    |
| Fut8Sinivicta          |   | TKP-----DVKRVFLASDDPKVITTARKRYP--NYEIIIGDPEIAETAS-VAKRYS DT    |
| Fut8Acephalotes        |   | TKP-----DVRRVFLASDDPKVITTARKRYP--NYEIIIGDPEIAETAS-VAKRYS DT    |
| FUT8Aechinator         |   | TKP-----DVRRVFLASDDPKVITTARKRYP--NYEIIIGDPEIAETAS-VAKRYS DT    |
| Fut8Phumanus           | 2 | QNG-----VEINRRRIYLATDDPKVIFEAKNKYP--DYDVIGDPDVAKTAG-MSTRYS DN  |
| Fut8Smaritima          | 2 | LRQ-----NVTERRIYLASDDPNVFAEAKRSFP--GFEFIGDPNIAKSAA-MATRYT DS   |
| Fut8Dpulex             | 2 | MKE-----KIKVRRVYLASDDPSVLPEAKKYP--EYEFLLGDVSIAGGAA-VATRYT DS   |
| Fut8Apisum             | 2 | LTD-----KVDKRRVYLATDEPKLFSEAKRKYP--EYEIFGDEDISKTAS-ISKRYSD Q   |
| Fut8Tcastaneum         |   | LKT-----SVDKRRRIYLATDDPKVIADAKSKYS--HYEILGDPISISKTAA-ISTRYS DS |
| Fut8Dmojavensis        |   | ING-----SSVRRIFLASDDARVIVEARKKYP--QYQIVGDPEVARMAS-VSTRYT DT    |
| Fut8Dpseudoobscura     |   | ING-----TTVRRRVFLASDDAVVIEEAREKYP--HYQIIIGDPEVARMAS-VSTRYT DT  |
| Fut8Dananassae         |   | VNG-----TSVRRIFLASDDALVIEEARRKYP--EYQIIIGDPEVARMAS-VSTRYT DT   |
| Fut8Dmelanogaster      |   | VNG-----STVARRIFLASDDAQVIEEARRKYP--QYQIIIGDPEVARMAS-VSTRYT DT  |
| Fut8Agambiae           | 0 | LTE-----KVDKRRVFLASDDPKVIEETKTKYP--HYEVIIGDPNVAKMAA-VSTRYT DS  |
| Fut8Aegypti            | 0 | MVE-----AIDKRRVFIASDDPKVIDEAKTKYP--HYEVIIGDPDVAKVAA-VSTRYT DS  |
| Fut8Cpiapiens          | 0 | MTE-----AIDKRRVFIASDDPKVIDEAKSKYP--HYEIIIGDPDVAKVAA-VSTRYT DS  |

i7c

Motif II

i8l

: : : \* : \* : : : : : \* \* \* :



Fut8Cjaponica 1 DIYYFGGQLAHEVLVIEDHVAQTP-QEIDLKVGDKVGIAGNHWNHNGYSKGTNRRT--FKEG  
 Fut8Celegans 1 DIYYFGGQQAHEVIVIEDHIAQNN-KEIDLKVGDKVGIAGNHWNHNGYSKGTNRQT--YKEG  
 Fut8Chrenneri 1 DIYYFGGQQAHEVIVIEDHVALNN-KEIDLKVGDKVGIAGNHWNHNGYSKGTNRRT--YKEG  
 Fut8Cremanei 1 DIYYFGGQQAHEVVVIEDHVALNN-KEIDLKVGDKVGIAGNHWDGYSKGTNRRT--YKEG  
 Fut8Asuum 1 DLYYFGGQLAHEQVVVEAYEAESK-QEISLKVGDVIGVAGNHWDGFSKGVNRRRT--GANG  
 Fut8Lloa 1 DIYYFGGQQAHEQVAVESYRAESG-NEIDLKIGDIIIGIAGNHWNHNGFSMGTNRRT--GKKG  
 Fut8Bmalayi 1 DIYYFGGQQAHEQVAVESYRAEND-NEIDLKIGDIIIGIAGNHWDGFSKGTNRRT--GKKG  
 Fut8Wbancrofti 1 DIYYFGGQQAHEQVAVESYRAEND-NEIDLKIGDIIIGIAGNHWDGFSKGTNRRT--GKKV  
 Fut8Tspiralis DVYFYGQHPHDVMA8YBEPGP-DEIELKIGDRIGIAGNHWNHNGYSKGVNRRRT--QKSG  
 Fut8Turticae DIYYFGGQNAHNQIAILNHDPPEP--QIPMKIGDTIGIAGNHWNHNGWSKGLNRVN--GKTG 1  
 Fut8Hmagnipapillata DIYYFGGQQEHKTRVWIPHTAKGR-SELDLVRVGDVIGIAGNHWNHNGQAKGLLHNL--QKTG 1  
 Fut8Nvectensis DIYYFGGQSGHNRAILPHTAETR-EEIDLEVGDVIGIAGNHWDGYSKGTNRRT--GQMG  
 Fut8Mocoidentalis DIFYFGGQKDHDEFAIADNLQPDSSGGEIAFKKGDIIIGIAGNHWDGYSKGINRRT--KQRG  
 Fut8Cintestinalis DVYFCGGQTAHEQTAVLHDHAPKPGSQEIELRIGDVVVLSGNHWDGYSKGTNRRT--KKTG 0  
 Fut8Lsalmonis DIWYFGGQDEHQEQEVIYHGPKTR-DEIELKVGDVIGVAGNHWDGFSKGNLNRN--RRVG  
 Fut8SpurpuratusA DIYYFGGQNAHEQTVLYEHKPGS-DEIEMRPGDSIGVAGNHWDGYSKGSNLRSTPRRAG  
 Fut8Cteleata DIYYFGGQNGHSGMA8YHEPRSGSEMQLVTGDHVGIAGNHWDGYSKGNRRRT--GKTG  
 Fut8SkowalevskiiA DVYFYGQNAHDEKVLVYTHIPRNG-AEIPLELDDAIGIAGNHWDGYSKGHNRRI--NKSG  
 Fut8Bfloridae DIYYFGGQGDHNQVAIAKHEPRNQ-QEITYLEQGDDELGVAGNHWDGYSKGVNRRRT--HKSG  
 Fut8Xtropicalis DIYYFGGQNAHNQIAIYPHQPRNA-EEIPLEPGDIIIGVAGNHWDGYSKGINRKL--GRTG  
 Fut8Rnorvegicus DIYYFGGQNAHNQIAYVPHKPRTD-EEIPMEPGDIIIGVAGNHWDGYSKGVNRRKL--GKTG  
 Fut8Hsapiens DIYYFGGQNAHNQIAIYAHQPRTA-DEIPMEPGDIIIGVAGNHWDGYSKGVNRRKL--GRTG  
 Fut8Btaurus DIYYFGGQNAHNQIAYVHEPRTA-DEIPMEPGDIIIGVAGNHWDGYSKGVNRRKL--GRTG  
 Fut8Acarolinensis DIYYFGGQNAHNQIAIYAHHPRTA-DEIPMEPGDIIIGVAGNHWDGYSKGVNRRKL--GKTG  
 Fut8Ggallus DIYYFGGQNAHNQIAYVAHHPRTA-DEIPMEPGDIIIGVAGNHWDGYSKGINRKL--GKTG  
 Fut8Mgallopavo DIYYFGGQNAHNQIAYVAHHPRTA-DEIPMEPGDIIIGVAGNHWDGYSKGINRKL--GKTG  
 Fut8Tguttata DIYYFGGQNAHNQIAIYAHHPRTA-DEIPMEPGDIIIGVAGNHWDGYSKGINRKL--GRTG  
 Fut8DrerioB DIYYFGGQNAHNQIAYPHQPRTA-EDIPLDPGDVIGVAGNHWDGNSKGINRKL--GRTG  
 Fut8Trubipres DIYYFGGQNAHNQIAIYPHQPRHG-DDIPLEPGDVVGVAGNHWDGYSKGVNRRKL--GRTG  
 Fut8Oniloticus DIYYFGGQNAHNQIAYVPHQPRNS-EDIPLDPGDVIGVAGNHWDGYSKGINRKL--GRTG  
 Fut8Olatipes DIYYFGGQNAHNQIAIYPHQPRNS-EDIPLDPGDVIGVAGNHWDGYSKGINRKL--GRTG  
 Fut8Hmelpomene 0 DIYYFGGQNAHRRRAVMPHTALDH-HQLDLQMGDLIGIAGNHWNHNGFGRGTNKRT--NLNG 0  
 Fut8Dplexippus 0 DIYYFGGQNAHRRRALMNHEA-GG-QEISFQAGDLIGIAGNHWNHNGFGRGTNKRT--NLNG 0  
 Fut8Bmori 0 DIYYFGGQNAHDRVAIMQNHGGKN-EDISFEVGDKIGVAGNHWNHNGYGRGTNKRT--NMNG 0  
 Fut8Sfrugiperda 0 DIYYFGGQNAHDRVAVMPNDG-AY-QDISFQVGDVIGIAGNHWNHNGYGRGTNKRT--NMNG 0  
 Fut8Msexta DIYYFGGQNAHDRVAVMSTGGKS-QDISFEAGDRIGIAGNHWNHNGYGRGTNKRT--NVNG  
 Fut8Mrotundata DIYYGGQNPHPHKVILDHQPRRS-GEIELKVGDLVEVFGNHWDGYSKGYNTRT--SMTG  
 Fut8Amellifera DIYYGGQNSHPHQVILDHKPRKD-GEIELKVGDLIEVFGNHWDGYSKGYNTRT--SMTG  
 Fut8Bimpatiens DIYYGGQNPHPHQAILDHKPRKE-GEIELKVGDLIEVFGNHWDGYSKGYNTRT--SMTG  
 Fut8Hsaltator DIYYGGQNPHPHVAIIDHKPRKN-GELELKAGDLIEVYGNHWDGFSKGYNSRT--SMTG  
 FUT8Cfloridanus DIYYGGQNPHPHVAILDHKPRKN-GELEMKIGDLIEVYGNHWDGFSKGYNTRT--SMTG  
 Fut8Sinivicta DIYYGGQNPHPHVAILDHKPRKN-GELELKTGDLIDVFGNHWDGYSKGYNTRT--SMTG  
 Fut8Acephalotes DIYYGGQNPHPHVAILDHKPRKN-GELELKVGDVIGVAGNHWDGFSKGYNTRT--SMTG  
 FUT8AechinatioR DIYYGGQNPHPHVAILGHKPRKN-GELELKVGDVIGVAGNHWDGFSKGYNTRT--SMTG  
 Fut8Phumanus 0 DVYFYGQNAHSSVAVLPHEPMNS-NEIELKVGDKIIIVAGNHWDGYSKGRNLR--NKEG  
 Fut8Smaritima DIYYFGGQNAHNHRVIVSHESQAS-NELELMAGDVIGIAGNHWDGYSKGINRRT--KQOG  
 Fut8Dpulex DIYYGGQGPHQIYAMYSKHAHRP-GEISIEVGDVIGIAGNHWDGYSKGTNERT--KQSG  
 Fut8Apisum DIYYGGQKRRRLHVAVLPHKANGP-HEMNLVVGDEIAVAGNHWDGYSKGTNLR--KESG  
 Fut8Tcastaneum DVYFYGQNPHTIIVLSHEPRKN-GEMSVVAGDLIGVAGNHWNHNGFSKGRNLR--NQIA  
 Fut8Dmojavensis DIYYGGQNPHNRAVIVPHKPRSH-EDLQLKVGDLVSVAGNHWDGNSKGNTRT--NQGG  
 Fut8Dpseudoobscura DIYYGGQNAHNRRVVIASPRTH-EDLQLRVDDLVSAGNHWDGNSKGNTRT--NQGG  
 Fut8Dananassae DIYYGGQNAHNRRVVIAPKPRSH-EDLQLRVGDVLSVAGNHWDGNSKGNTRT--NQGG  
 Fut8Dmelanogaster DIYYGGQNAHNRRVVIAPKPRTH-EDLQLRVGDVLSVAGNHWDGNSKGNTRT--NQGG  
 Fut8Agambiae DIYYGGQNSHNREVVLPHEPKNH-DEIQIRPGDLVGVAGNHWNHNGYSKGNLRT--NQVG  
 Fut8Aegypti DIYYGGQNAHNREVVLPHPKPNH-DEIHMKGDLIGVAGNHWNHNGYSKGNVRT--GOVG  
 Fut8Cpipiens DIYYGGQNAHNREVVLAHNPKNH-DEIHMKGDLVGVAGNHWNHNGYSKGNNSRT--SQVG  
 \*:\* \* \* \* : . : : \* : : \* \* \* \* \* \*

i101 i111

|                     |                                      |
|---------------------|--------------------------------------|
| Fut8Cjaponica       | VFPSYKVVNDWRTFFFSALLD-----           |
| Fut8Celegans        | VFPSYKVVNDWRKFKFEALLD-----           |
| Fut8Chrenneri       | VFPSYKVVNDWRQFNFEALLD-----           |
| Fut8Cremanei        | VFPSYKVVNDWRQFNFEALLD-----           |
| Fut8Asuum           | LYPSYKVKREKWIIVVFPF-----             |
| Fut8Lloa            | LYPSYKAREKYIIVDFP-----               |
| Fut8Bmalayi         | LYPSYKAREKYITLDFP-----               |
| Fut8Wbancrofti      | FIHLTKFVKS----ISP-----               |
| Fut8Tspiralis       | FYPSYKVEAWNLAETPYDW-SEILK-----       |
| Fut8Turticae        | LYPGFKADEKIDIAKFEAFDNIDT*-----       |
| Fut8Hmagnipapillata | LFPAYKIEDIHDVEEFPIPKE-----           |
| Fut8Nvectensis      | LYPSYKVEEVMETAQFPDFDL-----           |
| Fut8Moccidentalis   | LYPSFKTKEHVDVDFGDFIL-----            |
| Fut8CintestinalisA  | LYPSYKVNEKIPLKLYLTYPEADSYKGEANT---   |
| Fut8Lsalmonis       | LYPEYKTKEKFRIVEFRGLRGSEQS*-----      |
| Fut8SpurpuratusA    | LYPSYKVEDKTNIAKMPTYPEAENFOL-----     |
| Fut8Cteleta         | LFPYKVMVEDVEIIVDFPPTYPEATPQRGGGSR--- |
| Fut8SkowalevskiiA   | LYPSYKTEDKPNIAKMPTYPEADKVEL-----     |
| Fut8Bfloridae       | LYPSYKVEEKIELVKYPTYPEVEESS-----      |
| Fut8Xtropicalis     | LYPSYKVKKEIETVKYPTYQEAKE-----        |
| Fut8Rnorvegicus     | LYPSYKVKREKIETVKYPTYPEAKE-----       |
| Fut8Hsapiens        | LYPSYKVKREKIETVKYPTYPEAKE-----       |
| Fut8Btaurus         | LYPSYKVKREKIETVKYPTYPEAKE-----       |
| Fut8Acarolinensis   | LYPSYKVKKEIETVKYPTYPEADK-----        |
| Fut8Ggallus         | LYPSYKVKKEIETVKYPTYPEAKE-----        |
| Fut8Mgallopavo      | LYPSYKVKKEIETVKYPTYPEAKE-----        |
| Fut8Tguttata        | LYPSYKVKKEIETVKYPTYPEADK-----        |
| Fut8DrerioB         | LYPSYKVKKEIETVKYPTYPEADKMLSS-----    |
| Fut8Trubipres       | LYPSYKVKKEIETVKYPTYPEADKLLTAQK----   |
| Fut8Oniloticus      | LYPSYKVKREKIETVKYPMYPEADKLLNSQNK---  |
| Fut8Olatipes        | LYPSYKVKKEIETVKYPLYP-----            |
| Fut8Hmelpomene      | LVPWYKTADHLVLYPFPEYRHASTDS-----      |
| Fut8Dplexippus      | LIPWYKTADHLVLYPFPEYKHLQ--TETROKDL-   |
| Fut8Bmori           | LIPWYKTADHLVLYPFPEYKQVPIYSETSQKNV-   |
| Fut8Sfrugiperda     | LIPWYKTADHLVLYPFPEYKQVPLYTDTRQKDL-   |
| Fut8Msexta          | LIPWYKTADHLVLYPFPEYKQVQYSDTRQKNL-    |
| Fut8Mrotundata      | LFPFVKVKNPVDVDFPKYPNVPLNENKNE----    |
| Fut8Amellifera      | LFPFVKVKNPVDVDFPKYSNVPLRENKNE----    |
| Fut8Bimpatiens      | LFPFVKVKNPVDVDFPKYYPVPLQENRNE----    |
| Fut8Hsaltator       | LFPFVKVKNRVAADVDFPKYPSVPLENKID----   |
| FUT8Cfloridanus     | LFPFVKVKNPVDVDFPKYSNVLLVEDKTD----    |
| Fut8Sinivicta       | LFPFVKVKNPVDVDFPKYSNISPLENKDD----    |
| Fut8Acephalotes     | LFPFVKVKNPIDAVDFPKYSNIPLLENKED----   |
| FUT8AechinatioR     | LFPFVKVKNPVDVDFPKYSNIPLLENKED----    |
| Fut8Phumanus        | 0 LYPSFKVQNRVKVVDVDFPVNDGGLTF-----   |
| Fut8Smaritima       | LYPSFKATNKLQIADFPPTYPEVKQNELSSSR---  |
| Fut8Dpulex          | LYPSFKAVDKYNIIDFPYSEVAVAA-----       |
| Fut8Apisum          | 0 LYPTFKVSPKIETAPFASYPDVTLSTNELQEOKR |
| Fut8Tcastaneum      | LYPSFKVKDKIETAKFPPTYAEVDKHENDDQOIS-  |
| Fut8Dmojavensis     | LFPFVKVVDKVEDAKLPLVYPGV*-----        |
| Fut8Dpseudoobscura  | LFPFVKVEEKIDTAKLPLVYPGV-----         |
| Fut8Dananassae      | LFPFVKVEEKVDTAKLPLVYPGV-----         |
| Fut8Dmelanogaster   | LFPFVKVEEKVDTAKLPLYAGI-----          |
| Fut8Agambiae        | LFPFVKVNDKIEIVELPKYYPYVK-----        |
| Fut8Aaegypti        | LFPFVKVNDKIEVVELPPTYPNVK-----        |
| Fut8Cpipiens        | LFPFVKVNDKIEVVDLPHYPKVK-----         |

. \*
