# Supplementary material for: The α1,6-Fucosyltransferase Gene (fut8) from the Sf9 Lepidopteran Insect Cell Line: Insights into fut8 Evolution
Source: PubMed Central journal article supplement (PMC4204859; doi:10.1371/journal.pone.0110422), 2014-10-21

Figure S2

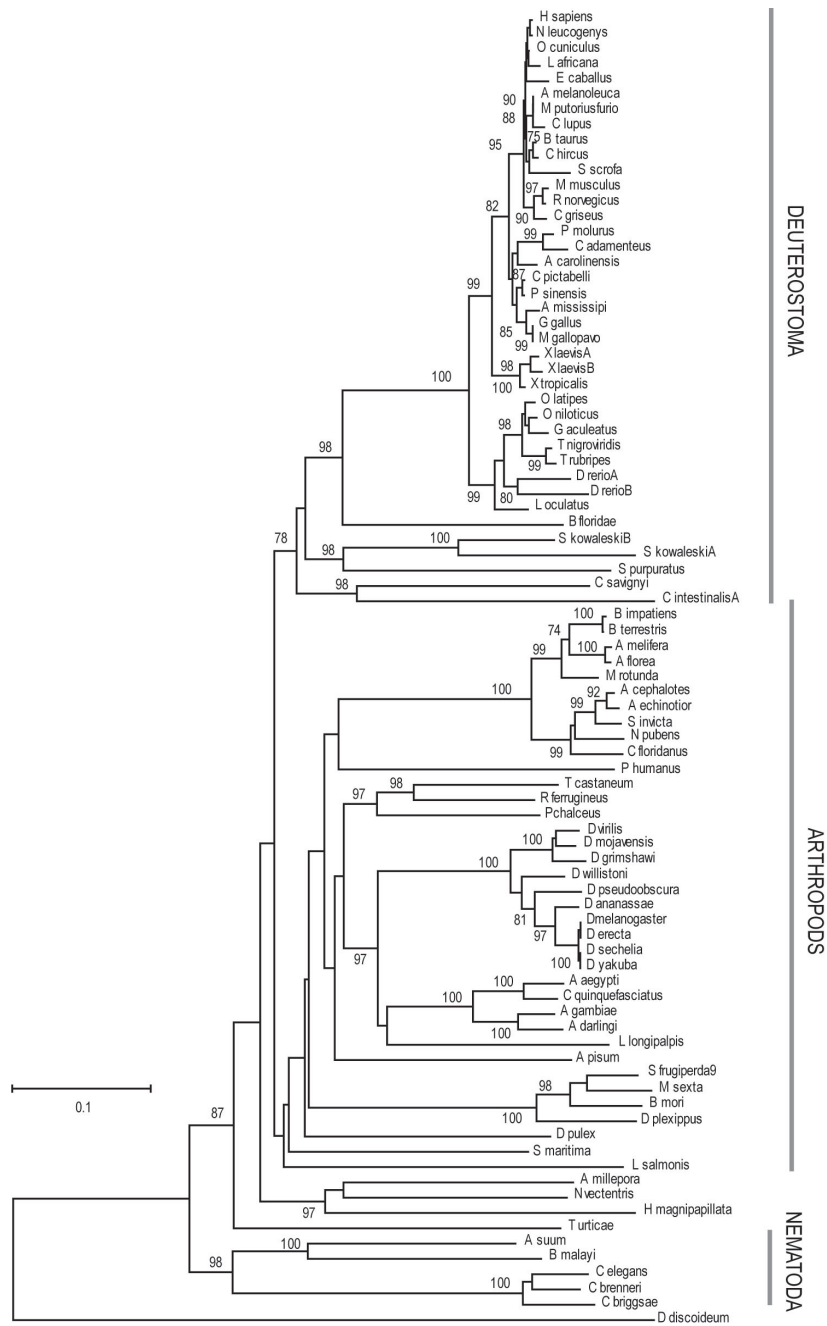

Supplement: pone.0110422.s002.pdf [file pone.0110422.s002.pdf]
