# Supplementary material for: The α1,6-Fucosyltransferase Gene (fut8) from the Sf9 Lepidopteran Insect Cell Line: Insights into fut8 Evolution
Source: PubMed Central journal article supplement (PMC4204859; doi:10.1371/journal.pone.0110422), 2014-10-21
Supplement: pone.0110422.s003.pdf [file pone.0110422.s003.pdf]

**Table S1**

| <b>Primer</b>                      | <b>Sequence</b>                         |
|------------------------------------|-----------------------------------------|
| <b>Cloning of cDNA</b>             |                                         |
| ForFut1deg                         | AACAARGGYTGTGGYTAYGGCTGYCARCTSCAYCATGTG |
| BacFut2deg                         | GTGSGCATTYTGRCNCCRWARTAGTAKATGTCRTCYAR  |
| For3'RACEFut8                      | CAGAGTGGCGTACGAGATGATGCAGCA             |
| Bac5'RACEFut8                      | GTACCTCCAGCCTTTGGAGTTGAGGATCAGG         |
| <b>Cloning of introns</b>          |                                         |
| . Intron 1                         | UVSF1<br>BacFutEco                      |
|                                    | GCGGCAACAGTGAGGAGTCGCTACAAGGATGCCGCCGCG |
|                                    | CCTCTCCTGGAATTCTGCTACCTCATC             |
| . Intron 2                         | ForFutEco                               |
|                                    | GATGAGGTAGCAGAATTCAGGAGAGG              |
|                                    | Fut8B5                                  |
|                                    | GGTCCCTGAACCCCGTCTAGGAACAGGGACCC        |
| . Intron 3                         | Forint10                                |
|                                    | GGTAACCTGAAGGACATAGACACAGGGTCCC         |
|                                    | B22                                     |
|                                    | CTGCCTCCACTCATTGTACCCGTCCAGC            |
| . Intron 4                         | Forint2                                 |
|                                    | CGTGCAACGACGACTGCACTATCTACAGAACC        |
|                                    | Bac5'RACEFut8                           |
|                                    | GTACCTCCAGCCTTTGGAGTTGAGGATCAGG         |
| . Introns 5 and 6                  | ForFut1                                 |
|                                    | AATAAGGGTTGCGGCTTCGGTTGCCAGCTACATCACATA |
|                                    | Bac21                                   |
|                                    | GATAGCTTTCTGCATCGCCTGGCGCGGC            |
| . Intron 7                         | Fut8F6                                  |
|                                    | GGCCAGATGCTGAAATACATTCTGAAGCCGCGCCAGGCG |
|                                    | Fut8B9                                  |
|                                    | CGTGGATGTGGTGGAAACGCCCTCCGTGCC          |
| . Intron 8                         | Fut8F11                                 |
|                                    | GGACTACTACGACCAGCTCGAGCTCACCCGCCCG      |
|                                    | Fut8B13                                 |
|                                    | GGCCGCCGTCTTGGCGATGGACGCGTCGCC          |
| . Introns 9 and 10                 | B13F                                    |
|                                    | GGGCGACGCGTCCATCGCCAAGACGGCGGCC         |
|                                    | B19                                     |
|                                    | GCCTCGACCGTAACCGTTCCAGTGGTTGCCCGCG      |
| . Intron 11                        | Fut8F19                                 |
|                                    | GGTTGGCGATTTAATAGGCATCGCGGGC            |
|                                    | BacStop                                 |
|                                    | GCAAGGATCCTTATAAGTCTTTCTGTCCGTGTCT      |
| <b>Synthesis of Southern probe</b> |                                         |
| B24                                | CCTTTCACCAATTTGGTCC                     |
| Forint10                           | GGTAACCTGAAGGACATAGACACAGGGTCCC         |
