# Supplementary material for: The α1,6-Fucosyltransferase Gene (fut8) from the Sf9 Lepidopteran Insect Cell Line: Insights into fut8 Evolution
Source: PubMed Central journal article supplement (PMC4204859; doi:10.1371/journal.pone.0110422), 2014-10-21
Supplement: pone.0110422.s004.pdf [file pone.0110422.s004.pdf]

Table S2

| Species                               | Protein length (aa) | GenBank Accession Number |
|---------------------------------------|---------------------|--------------------------|
| <i>Acromyrmex echinator</i>           | 590                 | EGI57854                 |
| <i>Acropora millepora</i>             | 597                 | JR981089                 |
| <i>Acyrtosiphon pisum</i>             | 567                 | XM_001947060             |
| <i>Aedes aegypti</i>                  | 573                 | XM_001658942             |
| <i>Ailuropoda melanoleuca</i>         | 575                 | XM_002914155             |
| <i>Alligator mississippiensis</i>     | 576                 | XP_006266233             |
| <i>Anolis carolinensis</i>            | 576                 | XM_003214611             |
| <i>Anopheles darlingi</i>             | 595                 | EFR26214                 |
| <i>Anopheles gambiae</i>              | 586                 | XM_321174                |
| <i>Apis florea</i>                    | 590                 | XM_003698480             |
| <i>Apis mellifera</i>                 | 590                 | XM_624898                |
| <i>Ascaris suum</i>                   | 570                 | J1169392                 |
| <i>Atta cephalotes</i>                | 597                 | BK008808*                |
| <i>Bombus impatiens</i>               | 590                 | XM_003485945             |
| <i>Bombus terrestris</i>              | 590                 | XM_003398241             |
| <i>Bombyx mori</i>                    | 562                 | XM_004928104             |
| <i>Bos taurus</i>                     | 575                 | BC104555                 |
| <i>Branchiostoma floridae</i>         | 553                 | XM_002613411             |
| <i>Brugia malayi</i>                  | 591                 | XP_001895912             |
| <i>Caenorhabditis brenneri</i>        | 560                 | EGT47213                 |
| <i>Caenorhabditis briggsae</i>        | 589                 | XM_002636779             |
| <i>Caenorhabditis elegans</i>         | 559                 | NM_072154                |
| <i>Caenorhabditis japonica</i>        | 580                 | CJA11459a**              |
| <i>Caenorhabditis remanei</i>         | 560                 | XM_003112605             |
| <i>Camponotus floridanus</i>          | 590                 | EFN69737                 |
| <i>Canis lupus familiaris</i>         | 575                 | AJ830717                 |
| <i>Capitella teleta</i>               | 589                 | ELU04531                 |
| <i>Capra hircus</i>                   | 575                 | JO595826                 |
| <i>Chrysemys picta belli</i>          | 576                 | BK008807*                |
| <i>Ciona intestinalis A</i>           | 580                 | XM_002129700             |
| <i>Ciona savignyi</i>                 | 535                 | BK008812*                |
| <i>Cricetulus griseus</i>             | 575                 | XM_003501735             |
| <i>Crotalus adamanteus</i>            | 576                 | JU174603                 |
| <i>Culex quinquefasciatus pipiens</i> | 573                 | XM_001849824             |
| <i>Danaus plexippus</i>               | 557                 | EHJ67895                 |
| <i>Danio rerio A</i>                  | 580                 | AJ781407                 |
| <i>Danio rerio B</i>                  | 579                 | XM_002666977             |
| <i>Daphnia pulex</i>                  | 585                 | EFX69666                 |
| <i>Dictyostelium discoideum</i>       | 603                 | XM_635964                |
| <i>Drosophila ananassae</i>           | 618                 | XM_001964192             |
| <i>Drosophila erecta</i>              | 619                 | XM_001977053             |
| <i>Drosophila grimshawi</i>           | 628                 | XM_001992034             |
| <i>Drosophila melanogaster</i>        | 619                 | AF441264                 |
| <i>Drosophila mojavensis</i>          | 627                 | XM_002010997             |
| <i>Drosophila pseudoobscura</i>       | 625                 | AJ830720                 |
| <i>Drosophila sechelia</i>            | 619                 | XM_002044075             |
| <i>Drosophila virilis</i>             | 625                 | XM_002058101             |
| <i>Drosophila willistoni</i>          | 644                 | XM_002064234             |
| <i>Drosophila yakuba</i>              | 619                 | AJ830719                 |
| <i>Equus caballus</i>                 | 575                 | XM_001499525             |
| <i>Gallus gallus</i>                  | 575                 | NM_001004766             |
| <i>Gasterosteus aculeatus</i>         | 583                 | ENSGACT00000011244**     |
| <i>Harpagathos saltator</i>           | 592                 | BK008805*                |
| <i>Heliconius melpomene melpomene</i> | 551                 | BK008802*                |
| <i>Homo sapiens</i>                   | 575                 | AJ536056                 |
| <i>Hydra magnipapillata</i>           | 575                 | XM_002161792             |
| <i>Lepeophtheirus salmonis</i>        | 572                 | BK008813*                |
| <i>Lepisosteus oculatus</i>           | 580                 | BK008809*                |

|                                      |      |              |
|--------------------------------------|------|--------------|
| <i>Loa loa</i>                       | 550  | XM_003142262 |
| <i>Loxodonta africana</i>            | 575  | XM_003408717 |
| <i>Lutzomyia longipalpis</i>         | >473 | BK008810*    |
| <i>Manduca sexta</i>                 | 564  | JO831253     |
| <i>Megachile rotundata</i>           | 590  | XM_003699654 |
| <i>Meleagris gallopavo</i>           | 575  | XM_003206402 |
| <i>Metaseiulus occidentalis</i>      | 550  | XM_003740372 |
| <i>Mus musculus</i>                  | 575  | NM_016893    |
| <i>Mustela putorius furo</i>         | 583  | XM_004738951 |
| <i>Nematostella vectensis</i>        | 554  | XM_001635608 |
| <i>Nomascus leucogenys</i>           | 575  | XM_003267827 |
| <i>Nylanderia pubens</i>             | 590  | JP776325     |
| <i>Oreochromis niloticus</i>         | 583  | XM_003446349 |
| <i>Oryctolagus cuniculus</i>         | 575  | XM_002719524 |
| <i>Oryzias latipes</i>               | 572  | XM_004083551 |
| <i>Pediculus humanus corporis</i>    | 608  | XM_002428546 |
| <i>Pelodiscus sinensis</i>           | 575  | XP_006113475 |
| <i>Pogonus chalceus</i>              | 592  | JU424712     |
| <i>Python molurus</i>                | 576  | BK008806*    |
| <i>Rattus norvegicus</i>             | 575  | NM_001002289 |
| <i>Rhynchophorus ferrugineus</i>     | 594  | JR486628     |
| <i>Saccoglossus kowalevskii A</i>    | 530  | XM_002736283 |
| <i>Saccoglossus kowalevskii B</i>    | 587  | XM_002735425 |
| <i>Solenopsis invicta</i>            | 590  | EFZ14951     |
| <i>Spodoptera frugiperda</i>         | 561  | KC538901     |
| <i>Strigamia maritima</i>            | 578  | BK008814*    |
| <i>Strongylocentrotus purpuratus</i> | 555  | XM_001197873 |
| <i>Sus scrofa</i>                    | 575  | D86723       |
| <i>Taeniopygia guttata</i>           | 575  | XM_002199852 |
| <i>Takifugu rubripes</i>             | 582  | AJ781408     |
| <i>Tetranychus urticae</i>           | 614  | BK008811*    |
| <i>Tetraodon nigroviridis</i>        | 582  | CAH03677     |
| <i>Tribolium castaneum</i>           | 592  | XM_964018    |
| <i>Trichinella spiralis</i>          | 545  | XM_003375058 |
| <i>Trichoplax adherens</i>           | >402 | XM_002108606 |
| <i>Wuchereria bancrofti</i>          | 582  | EJW88904     |
| <i>Xenopus laevis A</i>              | 578  | AJ514872     |
| <i>Xenopus laevis B</i>              | 578  | BC125984     |
| <i>Xenopus tropicalis</i>            | 578  | BC067957     |
